## 1 **Dorsal striatum coding for the timely execution of action sequences**

2 María Cecilia Martínez<sup>1,2</sup>, Camila Lidia Zold<sup>1</sup>, Mario Gustavo Murer<sup>1\*</sup>, Mariano Andrés Belluscio<sup>1\*</sup>.

3 1- Universidad de Buenos Aires y Consejo Nacional de Investigaciones Científicas y Técnicas  
4 (CONICET), Instituto de Fisiología y Biofísica “Bernardo Houssay” (IFIBIO-Houssay), Grupo de  
5 Neurociencia de Sistemas, Buenos Aires C1121ABG, Argentina.

6 2- Departamento de Fisiología, Biología Molecular y Celular “Dr. Héctor Maldonado”, Facultad de  
7 Ciencias Exactas y Naturales, Universidad de Buenos Aires, CONICET, Ciudad Universitaria Pabellón 2,  
8 AR1428EHA Buenos Aires, Argentina.

9 Author list footnotes\*. Co-senior authors

10 \* Correspondence: mbellu@fmed.uba.ar, gmurer@fmed.uba.ar .

## 11 **Summary**

12 The automatic initiation of actions can be highly functional. But occasionally these actions cannot  
13 be withheld and are released at inappropriate times, impulsively. Striatal activity has been shown to  
14 participate in the timing of action sequence initiation and it has been linked to impulsivity. Using a self-  
15 initiated task, we trained adult rats to withhold a rewarded action sequence until a waiting time interval  
16 has elapsed. By analyzing neuronal activity we show that the striatal response preceding the initiation of  
17 the learned sequence is strongly modulated by the time subjects wait before eliciting the sequence.  
18 Interestingly, the modulation is steeper in adolescent rats, which show a strong prevalence of impulsive  
19 responses compared to adults. We hypothesize this anticipatory striatal activity reflects the animals'

20 subjective reward expectation, based on the elapsed waiting time, while its steeper waiting modulation in  
21 adolescence reflects age-related differences in temporal discounting, internal urgency states or explore-  
22 exploit balance.

23 **Keywords:** Dorsal Striatum, Rat, Reward, Action sequence, Waiting time, Impulsivity, Adolescence,  
24 Reinforcement learning.

## 25 **Introduction**

26 The striatum is involved in the acquisition and execution of action sequences (Costa, 2011;  
27 Graybiel, 1998; Hikosaka et al., 1999). It has also been linked to temporal information processing  
28 (Bakurin et al., 2017; Emmons et al., 2017; Gouvêa et al., 2015; Matell et al., 2003; Mello et al., 2015)  
29 and to the use of temporal information for the action initiation timing in decision making (Thura and  
30 Cisek, 2017; Yau et al., 2020). Well-learned action sequences may have to be initiated at precise times to  
31 obtain the desired outcome, however, they may be difficult to withhold when triggering cues are present,  
32 and difficult to stop once they have been initiated (Dalley and Robbins, 2017; Gillan et al., 2016a;  
33 Graybiel, 2008; Knowlton and Patterson, 2016; Robbins and Costa, 2017). Moreover, in neuropsychiatric  
34 conditions involving malfunctioning of cortico-basal ganglia circuits, like attention deficit hyperactivity  
35 disorder, Tourette syndrome, obsessive compulsive disorder and drug addiction (Dalley and Robbins,  
36 2017; Gillan et al., 2016a; Singer, 2016) action sequences might be started at inappropriate contexts and  
37 timings. However, how the striatum contributes to action sequence initiation timing remains poorly  
38 understood.

39 Interestingly, impulsivity has been identified as a vulnerability factor for compulsive drug seeking  
40 habits (Belin and Everitt, 2008). Recent studies link impulsivity to automaticity in behavior (Ersche et al.,

41 2019; Gillan et al., 2016b; Hogarth et al., 2012) and to a preponderance of habitual over goal-directed  
42 behavioral control (Everitt et al., 2008; Voon et al., 2015). An influential theory postulates a dual control  
43 system for behavior, where dorsolateral striatal (DLS) circuits support habitual stimulus-response control  
44 whereas dorsomedial striatal (DMS) circuits mediate cognitive-based deliberative control (Balleine and  
45 Dickinson, 1998; Daw et al., 2005; Graybiel, 2008; Yin and Knowlton, 2006). During action sequence  
46 learning, neuronal activity in the DLS rapidly evolves to mark the initiation and termination of the  
47 acquired sequence (Jin and Costa, 2010; Jog, 1999), possibly contributing to its release as a behavioral  
48 unit or chunk (Graybiel, 2008). By contrast, the DMS encodes reward expectancy, reward prediction  
49 errors and trial outcomes even after extensive training (Kim et al., 2009; Kubota et al., 2009; Rueda-  
50 Orozco and Robbe, 2015; Samejima et al., 2005; Thorn et al., 2010; Vandaele et al., 2019), likely  
51 contributing to the regulation of explore-exploit (Barnes et al., 2005), cost-benefit (Floresco et al., 2008;  
52 Schultz, 2015) and speed-accuracy (Thura and Cisek, 2017) tradeoffs during decision making. A bias  
53 towards exploration and risk taking (Addicott et al., 2017), low tolerance to delayed rewards (Dalley and  
54 Robbins, 2017; Monterosso and Ainslie, 1999; Wittmann and Paulus, 2008) and elevated internal urgency  
55 states (Carland et al., 2019), may all contribute to impulsivity traits. However, how neuronal activity in the  
56 dorsal striatum encodes action sequence initiation timing, and whether this encoding informs about  
57 enhanced premature responding in conditions of high impulsivity, remains to be comprehended.

58         Here we studied striatal activity during a self-paced task where rats have to withhold a rewarded  
59 action sequence until a waiting interval has elapsed (Zold and Hussain Shuler, 2015). Prematurely initiated  
60 sequences were penalized by re-initiating the waiting interval; however, the animals showed premature  
61 responding even after extensive training and often failed to interrupt sequence execution despite sensory  
62 evidence of its untimely initiation. Thus, the task allowed comparing striatal activity during behaviorally  
63 indistinguishable prematurely and timely executed learned action sequences. We found that a peak of  
64 striatal activity preceding trial initiation was modulated by time waited before responding. Moreover, this

65 modulation grew at a faster rate in adolescent rats, likely reflecting a steepest reward expectancy increase  
66 during waiting that paralleled their more impulsive behavior compared to adult rats.

## 67 **Results**

### 68 *Rats learn to make timely action sequences to obtain a water reward*

69 Water-deprived rats were trained to obtain water from a lick tube located within a nose-poke by  
70 emitting a sequence of eight licks following a visual cue (Figure 1a and b; task modified from Zold and  
71 Hussain Shuler,2015). Trials were self-initiated by the animal by entering into the nose-poke. In those  
72 trials initiated 2.5 s after the end of the previous trial (timely trials), a 100 ms duration visual cue (two  
73 symmetrical green LEDs located at the nose-poke sides) reported that there was a 0.5 probability of  
74 receiving a water reward. Prematurely initiated trials were penalized by re-initiating the waiting interval.  
75 Spike discharges and local field potentials (LFP) were recorded from the dorsal striatum using custom  
76 made tetrodes (Vandecasteele et al., 2012) (representative localization Figure 1c, for detailed localization  
77 see Supplementary Figure 10).

78 Adult rats learned to make timely nose-poke entries followed by an 8-lick sequence (Figure 1d), as  
79 evidenced by a twofold higher reward rate late in training (after three consecutive sessions with >70%  
80 correct trials) than early in training (Figure 1e,  $p < 0.0001$ , Wilcoxon matched pairs test). Performance  
81 became faster with training (Figure 1f-h): trial duration ( $p = 0.0005$ ), latency to the first lick ( $p = 0.0032$ ) and  
82 time to complete the 8-lick sequence ( $p = 0.0008$ ), diminished with training for both rewarded and  
83 unrewarded timely trials (significant effect of learning stage, non-significant interaction, two-way RM-  
84 ANOVAs).

85 Premature nose-poke entries delayed the opportunity to get the reward as evidenced by a negative  
86 correlation between the relative number of premature trials and reward rate across sessions (Figure 2a).

87 Premature trials diminished with training from >30% of all trials at the beginning of training to ~15% at  
88 the end of training. However, premature trials followed by an 8-lick sequence rose from 40% to 70% of all  
89 premature trials with training, paralleling the relative increase of 8-lick sequences observed in timely trials  
90 (Figure 2b,  $p < 0.0001$  for learning stage and trial timing, no interaction, two-way RM-ANOVA). These  
91 data suggested that behavior during premature trials was modified by learning. Further supporting this  
92 presumption, time to complete the 8-lick sequence ( $p = 0.0014$ ), latency to the first lick of the sequence  
93 ( $p = 0.002$ ) and variation coefficient of the inter-lick intervals (an index of regularity of such intervals;  
94  $p = 0.021$ ), diminished with training both for timely and premature trials (Figure 2c-e; significant effect of  
95 learning stage, no effect of trial type, no interaction, two-way RM-ANOVA). Remarkably, even though  
96 premature trials had a negative effect on reward rate (Figure 2a), there was a significant positive  
97 correlation between the percentage of premature trials followed by an 8-lick sequence and reward rate  
98 (Figure 2f).

99 To characterize the timing of trial initiations in adult rats, plots showing the frequency distribution  
100 of all trial initiation times were built (Figure 2g-h). The probability of a trial including an 8-lick sequence  
101 sharply increased at the end of the 2.5 s waiting interval, peaked immediately after its finalization, and  
102 then diminished gradually. Similar results were observed in a separate group of rats trained with a longer  
103 waiting interval (Supplementary Figure 1a-h). Finally, rats trained with the long waiting interval (5 s)  
104 quickly learned to adjust trial initiations to a shorter waiting interval (2.5 s) (Figure 2i), suggesting that  
105 premature trials with 8-lick sequences served to adapt behavior to changes in the waiting time  
106 requirements of the task that otherwise would have passed unnoticed to the rats.

107 An additional group of adult rats was trained with a modified version of the task that required  
108 initiating trials not before 2.5 s and no later than 5 s after exiting the port in the previous trial. These  
109 animals showed similar behavior with a more marked decrease of trial initiations after the peak rate  
110 observed at 2.5 s was passed (see below; Supplementary Figure 2).

111           Altogether, the data show that adult rats optimized reward rate by waiting the least possible time  
112 between trials. Noteworthy, premature execution of the learned behavioral response was (relatively) more  
113 common late in training than early in training, suggesting that with training behavior became less sensitive  
114 to the absence of the reward predictive visual cue.

#### 115 *Task-sensitive striatal activity concentrates at the boundaries of the learned behavioral response*

116           To determine if striatal activity marks the boundaries of the learned action sequence in our task (Jin  
117 and Costa, 2010; Jog, 1999), DMS activity recorded from adult rats was analyzed by aligning the activity  
118 to port entry and port exit (Figure 3a-c). Visual inspection of neuronal raster plots and peri-event time  
119 histograms (PETH) showed strong modulations of DMS activity preceding port entry and/or at the time of  
120 port exit, during timely trials (Figure 3a-b). Overall, ~50% of the recorded units (n=867) showed higher  
121 activity (>1 SD over baseline) preceding port entry (“anticipatory activity”; 19%, Figure 3d), at the time  
122 of port exit (18%, Figure 3e) or both before port entry and at port exit (12%, Figure 3f). On average, these  
123 neurons showed lower than baseline firing rates during the execution of the learned action sequence  
124 (Figure 3d-f). There were also neurons (n=105, 12% of all recorded neurons) showing higher activity  
125 when the animal was inside the port than during the waiting period or at the initiation and finalization of  
126 the action sequence (Figure 3g). Finally, 82 neurons classified as non-task responsive were tonically active  
127 during the waiting period regardless of the waited time (Supplementary Figure 3a). All main types of task-  
128 related activity emerged early during training (Supplementary Figure 3b).

129           Thus, although DMS activity was continuously modulated during the present task, modulations at  
130 the boundaries of the behavioral response accounted for about 50% of all task related activity and more  
131 than 30% of the recorded neurons showed a peak of activity anticipating trial initiation.

132 *Waiting time modulates anticipatory activity*

133           Striatal activity anticipating a learned behavioral response could specifically mark the initiation of  
134 a previously rewarded action sequences (Jin and Costa, 2010; Jog, 1999; Martiros et al., 2018) or relate to  
135 additional factors, like reward anticipation and the vigor and value of the upcoming action (Lauwereyns et  
136 al., 2002; Samejima et al., 2005; Wang et al., 2013). Moreover, it has been proposed that changes in  
137 striatal activity preceding the initiation of a prepotent action may predict premature responding (Buckholz  
138 et al., 2010; Donnelly et al., 2014; Wu et al., 2018). Because in the present task an automatized action  
139 sequence is often prematurely released, we asked if the observed anticipatory activity specifically predicts  
140 the release of the learned action sequence, and if, additionally or alternatively, it encodes its timing. When  
141 all port entry responsive neurons were considered (i.e., port entry only plus port entry/port exit neurons),  
142 the average firing rate modulation anticipating trial initiation was higher for timely than for premature  
143 trials irrespective of the upcoming action including the 8-lick sequence or not (Figure 4a-b;  $p < 0.0001$ ,  
144 significant main effect of trial initiation timing, no effect of action sequence structure, no interaction, two  
145 way RM-ANOVA). On average, this activity began 1 s before and peaked 0.5 s before the animal crossed  
146 the infrared beam located at port entry, both in premature and timely trials (Figure 4a). Further data  
147 analysis showed that this modulation of striatal activity by trial initiation timing was independent of  
148 electrode location within the DMS and involved both port entry only and port entry/port exit neurons  
149 (Supplementary Figure 4a-b). Since this anticipatory activity closely preceded approaching movements  
150 towards the nose-poke, we analyzed accelerometer recordings of head movements performed during the  
151 task. The accelerometer recordings did not differ between premature and timely trials (Figure 4c).  
152 Furthermore, the 8-lick sequences emitted during premature and timely trials lasted the same and had the  
153 same latency and inter-lick interval regularity (Figure 2c-e), suggesting similar action vigor during  
154 premature and timely 8-lick trials. Thus, in this task, the firing rate modulation preceding trial initiation  
155 discriminates between premature and timely trials and does not predict the speed, regularity, structure,

156 value or vigor of the subsequently released action sequence.

157 To further investigate this anticipatory activity, we plotted its amplitude at increasing waiting times  
158 observing that it increased with a steep slope as time waited surpassed the learned waiting interval and  
159 then plateaued (Figure 4d-e). Similar results were obtained in rats trained with a longer waiting interval  
160 (Supplementary Figure 5). Contrastingly, no modulation of this same neuronal activity by time waited in  
161 the following trial (Figure 4f), or of port exit related activity by the preceding waiting time (Figure 4g),  
162 was observed. The steep slope of the curve at the criterion waiting interval suggested that the neuronal  
163 activity does not linearly report elapsed time but rather changes in reward anticipation as waiting  
164 progressed. To explore this possibility further, we analyzed striatal activity of rats trained with a modified  
165 version of the task requiring initiating trials not before 2.5 s and no later than 5 s after exiting the port in  
166 the previous trial. Waiting less than 2.5 s (premature trials) or more than 5 s (late trials) was penalized by  
167 resetting the waiting interval (Figure 4h). We reasoned that if this activity provides a wait time-based  
168 reward anticipation signal for the upcoming action, it should decrease (instead of plateauing) after 5 s of  
169 waiting in the modified version of the task. As in the standard version of the task, the animals learned to  
170 wait the less possible time between trials, and also noticed the effect of the cutoff time on reward  
171 probability, as evidenced by a reduced number of late trials with training (Figure 4i,  $p < 0.0001$  versus  
172 timely trials, Tukey post hoc test after significant one-way RM-ANOVA; Supplementary Figure 2). The  
173 firing rate modulation preceding trial initiation increased with a steep slope at 2.5 s, confirming results  
174 obtained with the basic version of the task, but instead of plateauing, it decreased after surpassing the 5 s  
175 cutoff time, yielding a significant interaction in a two way ANOVA comparing the effects of waiting time  
176 on anticipatory activity (Figure 4j and 4k, significant effect of training,  $p = 0.033$ , trials,  $p < 0.0001$ , and  
177 interaction, two-way RM-ANOVA).

178 In summary, the marked modulation of striatal activity preceding trial initiation probably reflects  
179 subjective changes in reward anticipation as waiting progressed.



180 *Trial initiation timing modulates striatal activity at predicted outcome time*

181           Striatal activity can be modulated by reward-predictive sensory cues (Schultz, 2015). In the present  
182 task, a small population of neurons whose activity was modulated at the time of the visual cue (n= 27, 3%  
183 of all recorded neurons) showed lower activity during premature trials, when the visual cue was not  
184 presented ( $p < 0.05$  versus timely trials, Tukey post hoc test after significant one-way RM ANOVA)  
185 (Supplementary Figure 6). This modulation by trial initiation timing was similar to that observed in port  
186 entry neurons and may represent the same kind of wait time-based reward anticipation activity that  
187 extends until when sensory feedback discloses if reward could be obtained or not. In contrast, neurons  
188 showing increased activity during licking did not show any modulation by trial initiation timing (Figure 5a  
189 and 5b). Detection of activations occurring during narrow time windows centered over individual licks  
190 yielded largely overlapping populations of positively modulated neurons with broad activity peaks  
191 encompassing many inter-lick intervals (Figure 5b). This modulation lasted longer during rewarded trials  
192 (where licking also persisted for longer) than during timely unrewarded and premature trials, but was of  
193 similar amplitude at the time when reward was expected irrespective of reward delivery or omission  
194 (Figure 5b, activity centered at the eight lick), suggesting that these neurons were modulated by licking.

195           Striatal activity is also modulated by trial outcome and distinguishes between rewarded and non-  
196 rewarded trials in probabilistic tasks (Atallah et al., 2014; Histed et al., 2009; Nonomura et al., 2018; Shin  
197 et al., 2018; Yamada et al., 2011). In the present task, premature 8-lick trials seem to be necessary to  
198 maintain an internal representation of the criterion waiting interval. To determine if the negative outcome  
199 associated to premature 8-lick trials is reported by striatal neurons, we looked for outcome-related activity  
200 modulations at the time of the eight lick during timely rewarded, timely unrewarded and premature trials  
201 with complete sequences (Figure 5c-g). Overall, ~15% of the neurons recorded in adult rats (125 out of  
202 867) showed responses at the time of the 8-lick that differed between these trial types. Five percent of all

203 recorded neurons (n= 45) showed a higher activity modulation when reward was obtained than in the no-  
204 reward conditions (Figure 5c, f top – reward responsive neurons,  $p < 0.0001$ , Tukey test after significant  
205 one-way RM ANOVA), before lick rates began to diverge by trial type (Figure 5h). Moreover, 5% of the  
206 striatal neurons showed activations at the time of the no-reward outcome in timely unrewarded trials and  
207 were unresponsive to reward delivery (Figure 5d). Interestingly, these neurons also showed a marked  
208 activation at the time of the 8-lick during premature 8-lick trials (Figure 5d, f middle – no-reward  
209 responsive neurons,  $p < 0.0001$  versus rewarded trials, Tukey test after significant one-way RM ANOVA).  
210 Strikingly, there were 33 neurons (4% of all recorded neurons) that showed a two-fold higher activation at  
211 the time of the eight lick in premature trials than in timely unrewarded trials (Figure 5e, f bottom;  
212  $p < 0.0001$ , Tukey test after significant one-way RM ANOVA). This difference cannot be explained by  
213 differences in lick rates because licking decreased at similar rates after the 8-lick in both types of non-  
214 rewarded trials (Figure 5h). Further data analysis showed that, indeed, the three populations of outcome  
215 responsive neurons discriminated timely unrewarded from premature 8-lick trials; however, those showing  
216 a higher activation during premature trials discriminated better between these two no-reward conditions  
217 (Figure 5g). Overall, the data supports that activity at the time of expected trial outcome reflects  
218 differences in reward prediction between premature and timely trials.

219 *Activity at port exit reports whether the animal has performed the learned action sequence or not*

220 Although striatal activity predominated at the boundaries of the learned behavioral response, the  
221 activity preceding response initiation was not invariably connected to the execution of the learned action  
222 sequence. However, when all port exit neurons were considered (i.e., port exit only plus port entry/port  
223 exit neurons), a higher activity was observed for 8-lick trials than for trials with an incomplete licking  
224 sequence, independently of whether the trials were timely initiated or not (Figure 6a-b;  $p < 0.001$  for lick  
225 sequence structure, no effect of trial timing, no interaction, two way RM ANOVA). Discrimination of

226 incomplete lick sequence trials was more marked in the port exit only neurons and was independent of  
227 striatal recording site (Supplementary Figure 4c-d). Moreover, there was no between trials difference in  
228 the accelerometer data at the time animals exited the port (Figure 6c). Thus, port exit related activity  
229 seems to tell if the learned response was emitted or not regardless of its timing and outcome.

### 230 *Adolescent rats make more premature trials*

231 Rats implanted with tetrodes 30-35 days after birth learned the 2.5 s waiting interval task as shown  
232 by a higher percentage of correct trials (Figure 7a), a higher reward rate (Figure 7b,  $*p < 0.0001$ , Wilcoxon  
233 matched pairs test), and a faster performance with training (Supplementary Figure 7). Moreover, trial  
234 duration, latency to first lick and 8-lick sequence duration did not differ between adolescent and adult rats  
235 (Supplementary Figure 7a-c), nor between premature 8-lick and timely 8-lick trials in adolescent rats  
236 (Supplementary Figure 7e-g). Finally, the proportion of premature 8-lick sequence trials increased with  
237 training in adolescent rats (Figure 7c;  $p < 0.0001$ , significant effects of learning stage and trial timing, no  
238 interaction, two-way RM ANOVA), in parallel with reward rate (Figure 7d), and the frequency distribution  
239 of trial initiation times showed that adolescent rats learned the waiting interval (Figure 7e). In summary,  
240 adolescent rats also released the learned action sequence prematurely despite extensive training, and  
241 indeed, they did it more frequently than adult rats (Figure 7f and 7g). The number of premature trials per  
242 reward obtained was twofold higher in adolescent than adult rats even after training (Figure 7f;  $p = 0.004$ ,  
243 significant effects of age group, training, and interaction, two-way RM ANOVA), and this was due to a  
244 preferential retention of the premature 8-lick trials through training (Figure 7g;  $p = 0.0024$ , significant  
245 effect of age group, no effect of training, no interaction, two-way repeated measures ANOVA). Finally, a  
246 comparison of the cumulative frequency distributions of 8-lick trial initiation times at late stages of  
247 training showed that the relative excess of premature 8-lick trials observed in adolescent rats parallels an  
248 excess of late (yet rewarded at  $p = 0.5$ ) trials in adult rats (Figure 7h), suggesting that adult rats are more

249 tolerant to reward delay. Altogether, adolescent rats achieved the same reward rate as adult rats but at the  
250 expense of a higher cost as evidenced by the excess of premature responses per reward obtained.

### 251 *Steepest reward anticipation signal preceding trial initiation in adolescent rats*

252 Overall, task-related striatal activity was qualitatively similar in adolescent and adult rats  
253 (Supplementary Figure 8). Of the registered units in adolescents (n=552), the proportion of neurons  
254 showing port entry, port exit and lick-related activity was similar to that found in adult rats (Figure 7i;  
255  $p=0.83$ , chi square test). Also like in adult rats, the activations preceding port entry were higher for timely  
256 than for premature trials regardless of whether the 8-lick sequence was completed or not (Supplementary  
257 Figure 9). Outcome-related activations discriminating reward delivery from reward omission, and  
258 selective activations at expected reward time during premature 8-lick trials, not attributable to differences  
259 in lick rate, were also present (Supplementary Figure 9).

260 We therefore looked for quantitative differences in task-related activities that could account for the  
261 more impulsive behavior of adolescent rats. Data from three adolescent and five adult rats (133 and 103  
262 DMS neurons with anticipatory activity, respectively) trained in the 2.5 s waiting interval task were used  
263 for the following analysis. Curves displaying the amplitude modulation of activity preceding trial  
264 initiations at increasing waiting times, probably reflecting reward anticipation, showed a steepest increase  
265 in adolescent rats as the criterion waiting interval was surpassed (Figure 7j). When all port entry  
266 modulated neurons were considered, statistical comparisons based on a general linear model showed a  
267 significantly higher activity modulation by waiting time in adolescent rats (significant effect of age,  
268  $p<0.001$ , and waiting time,  $<0.001$ , no interaction). On the other hand, activations at time of expected  
269 reward (Figure 7k,  $p<0.0001$ , effect on trial initiation timing, Restricted Maximum Likelihood test,  
270 REML) and activity at port exit, probably reflecting that the correct action sequence was emitted (Figure  
271 7l,  $p<0.0001$ , significant interaction between trial initiation timing and sequence structure, three-way

272 ANOVA), did not differ between adolescent and adult rats.

273 In sum, the data show that the waiting modulation of reward anticipation grows at a faster rate in  
274 adolescent rats.

## 275 **Discussion**

276 In the present task, water-deprived rats learn to withhold a prepotent response to a water port to  
277 avoid a negative contingency, the re-initiation of the waiting interval, which delays the opportunity to get  
278 the next reward. The task resembles differential reinforcement of low rates of responding protocols (DRL)  
279 that are used to assess response inhibition and timing factors associated with impulsivity (Monterosso and  
280 Ainslie, 1999; Neill, 1976). Factors that increase premature responding in humans, such as  
281 psychostimulant drugs (Evenden, 1998), psychostimulant withdrawal (Peterson et al., 2003), D2-type  
282 receptor agonists (Engeln et al., 2016), maternal separation and social isolation (Lovic et al., 2011), sleep  
283 restriction (Kamphuis et al., 2017) and adolescence (Andrzejewski et al., 2011) also increase premature  
284 responding in rodents trained with DRL procedures. Furthermore, these procedures have been used in  
285 educational and clinically meaningful contexts to reduce impulsive behavior (Bonner and Borrero, 2018;  
286 Lennox et al., 1987). Unlike classical DRL procedures, the present task requires responding with an action  
287 sequence that becomes highly automatized with training and could not always be stopped despite feedback  
288 telling that it will not be rewarded. Interestingly, although premature responding showed an overall  
289 decrease with training, the premature releases of the learned action sequence were selectively preserved,  
290 suggesting that these responses are necessary to learn the duration of the waiting interval and to adapt to  
291 its changes. As long as the waiting interval remains predictable, investigation of the waiting interval  
292 through premature responding should be minimized to improve reward rate. Importantly, adolescent rats  
293 learn the task but make more premature responses per reward obtained, which makes them more  
294 impulsive than adults.

295           Recent studies link premature responding in anticipation of reinforcement to a higher tendency to  
296 automatize behavior and form habits (Everitt et al., 2008; Voon et al., 2015). Striatal activity marking the  
297 boundaries of automatized action chains has been perceived as a signature of "packaged behavioral  
298 sequences" (Graybiel, 2008) that would be difficult to stop after their release regardless of whether their  
299 initiation was more or less goal-directed (Geddes et al., 2018; Robbins and Costa, 2017). While this  
300 "bracketing activity" prevails in the DLS, representation of task events contributing to goal-directed  
301 behavior persists in the DMS even after extensive training (Kubota et al., 2009; Thorn et al., 2010) . These  
302 parallel representations may allow switching between automatic and deliberation-based task-solving  
303 strategies when outcomes change (Balleine and Dickinson, 1998; Daw et al., 2005; Yin and Knowlton,  
304 2006) or interventions impair behavioral control by one of the circuits involved (Gremel and Costa, 2013;  
305 Smith and Graybiel, 2013; Yin et al., 2004). The remarkably similar behavior observed in 8-lick  
306 prematurely released and timely unrewarded trials led us to expect that a stronger boundary activity,  
307 and/or a less precise coding of task events, could explain the higher rates of premature responding  
308 observed in adolescent rats. Indeed, a recent study suggested that the stronger the "opening" activity, the  
309 lower the deliberation at the turn-choice site in a T-maze task (Smith and Graybiel, 2013). Here, the  
310 strength of anticipatory activity increased with the time waited before response release and was higher in  
311 the more impulsive adolescent rats. However, it did not predict that the rewarded 8-lick sequence would  
312 be included in the behavioral response. On the other hand, a similar closing activity followed all responses  
313 containing the learned 8-lick sequence regardless of trial outcome and despite the markedly different lick  
314 rates observed between rewarded and unrewarded responses after outcome disclosure. A recent study  
315 showed that hierarchical control during action sequence execution may allow the selective removal of  
316 intermediate sequence elements (Geddes et al., 2018), which could be a mechanism through which licks  
317 could be deleted from behavioral responses preceded by similar wait time-based reward expectations in  
318 the present task. Moreover, since our recordings were obtained from the DMS, we cannot rule out that a  
319 different opening activity specific for the learned sequence emerges in the DLS in our task as previously

320 reported for other tasks (Jin and Costa, 2010; Jog, 1999; Martiros et al., 2018; Thorn et al., 2010).  
321 Importantly, while striatal neurons with opening and/or closing activity were poorly modulated during  
322 sequence execution, as shown in other studies (Jin and Costa, 2010; Jog, 1999), the activity of many  
323 striatal neurons seemed to continuously follow the expression of the lick sequence as has also been  
324 reported previously by others (Jin and Costa, 2010; Jin et al., 2014; Rueda-Orozco and Robbe, 2015).  
325 Overall, our data show that the DMS expresses opening/closing activity even after skilled performance is  
326 reached, as reported in a recent study with a different task (Vandaele et al., 2019), and suggest that, at least  
327 in the DMS, this activity is more flexible regarding the properties of the behavioral response it bounds,  
328 and carries information about its pertinent timing.

329 We speculated that the more impulsive behavior of adolescent rats observed in the present task  
330 could relate to changes in wait time-based reward anticipation signals and/or outcome evaluation signals.  
331 Striatal signals at the time of expected outcome not only discriminated between rewarded and unrewarded  
332 trials as observed by others (Atallah et al., 2014; Nonomura et al., 2018; Shin et al., 2018), but also  
333 premature from timely responses. A specific outcome evaluation signal after premature 8-lick trials may  
334 serve to minimize the exploration of the waiting interval. To compute such outcome signal, the animal has  
335 to retain information regarding the time waited before responding (or regarding visual feedback on proper  
336 trial initiation timing) while monitoring the execution of the lick sequence. Such kind of integration could  
337 be implemented by retaining information of early task events along the sequential activation of striatal  
338 ensembles (Her et al., 2016; Nonomura et al., 2018). However, although the effect of waiting time on task-  
339 related striatal activity extended until the time of the visual cue, it was absent in ensembles with lick-  
340 related activity. Thus, the sustained lick-related signal may serve to estimate outcome timing (Zold and  
341 Hussain Shuler, 2015), but information about trial initiation timing should arrive to outcome-sensitive  
342 ensembles through other mechanisms likely involving inputs from prefrontal and orbitofrontal cortex  
343 areas (Asaad et al., 2017; Hamid et al., 2021; Wassum et al., 2011). Nonetheless, we found no differences

344 in outcome evaluation signals that could explain the more impulsive behavior of adolescent rats. On the  
345 other hand, although premature responding has classically been linked to poor behavioral inhibition (Bari  
346 and Robbins, 2013), alternative views equates it to preferring a smaller more immediate reward over a  
347 larger delayed one (Dalley and Robbins, 2017; Monterosso and Ainslie, 1999), and to deficient  
348 accumulation or evaluation of evidence while waiting (Dalley and Robbins, 2017). Interestingly,  
349 influential models propose that time estimates derived from accumulation of pacemaker counts can be  
350 compared to a memorized time interval to decide whether a target time has been reached (Buhusi and  
351 Meck, 2005; Gibbon, 1977; Namboodiri and Hussain Shuler, 2016). Previous studies showed that  
352 sequentially activated striatal ensembles can provide time estimations (Bakhurin et al., 2017; Emmons et  
353 al., 2017; Gouvêa et al., 2015; Matell et al., 2003; Mello et al., 2015; Zhou et al., 2020) and we also found  
354 sequential and tonic ensemble activation during the waiting period (Figure 3b and Supplementary Figure  
355 3a) that could serve to track time while waiting in the present task. By comparing the time accumulated  
356 while waiting against the memorized waiting interval, the animal could anticipate how likely is the  
357 upcoming action to be rewarded. How fast reward expectancy steps up when time waited approaches the  
358 reference time interval would depend on several factors, including temporal discounting effects on reward  
359 value (Monterosso and Ainslie, 1999; Namboodiri and Hussain Shuler, 2016; Wittmann and Paulus,  
360 2008). In this sense, the anticipatory signal we observe could be interpreted as a reading of the temporal  
361 discount function at the time chosen to release the learned action sequence. A recent theory proposes that  
362 animals time their decisions by estimating if they can improve the reward rate experienced in the recent  
363 past; according to it, the longer the time window over which reinforcement history is estimated, the higher  
364 the tolerance to delays of future rewards (i.e., the less steep the temporal discount effect) (Namboodiri et  
365 al., 2014) . Adults should be able to integrate information about past reinforcement history over longer  
366 time windows than adolescents (Namboodiri et al., 2014), which is consistent with the finding that  
367 temporal discount rate decreases throughout childhood and adolescence (Green et al., 1999; Scheres et al.,  
368 2006; Steinberg et al., 2009). Alternative theories propose that waiting impulsivity relates to perceiving



369 durations as longer as they are, which would be associated to perceiving a higher cost of time and to  
370 steeper temporal discounting (Wittmann and Paulus, 2008). Moreover, time perception depends on several  
371 cognitive processes that are modified by adolescence including working memory, attention and mood  
372 (Baumann and Odum, 2012; Wittmann and Paulus, 2008). It has been also been proposed that impulsivity  
373 relates to changes in an internal urgency signal that influences the timing of decisions and may be primary  
374 responsible for the build-up of neural activity observed in the striatum and cortex that often precedes  
375 action initiation (Carland et al., 2019). Interestingly, in the present task, adolescent rats achieve a similar  
376 reward rate than adult rats and indeed, they do not show the negative effect of premature trials on reward  
377 rate that is observed in adults (Supplementary Figure 7). Importantly, although they achieve this reward  
378 rate at the expense of a higher energy cost (more premature trials per reward obtained), because most  
379 premature trials remaining after reaching skilled performance correspond to the learned action sequence,  
380 adolescents would likely get more precise information regarding the duration of the waiting interval and  
381 would also refresh more frequently their cognitive map of the task. This view is consistent with the idea  
382 that impulsivity is advantageous when it helps to adapt to uncertain environments and that increased  
383 exploratory behavior in adolescence allows to gain knowledge that would be useful to guide decisions in  
384 adulthood (Addicott et al., 2017; Spear, 2000). In this context, the steepness of the wait time-based reward  
385 anticipation signal could be under the influence of a gain factor that, according to reinforcement learning  
386 models, reflects the degree of preference for the highest value option and regulates explore-exploit trade  
387 off (Addicott et al., 2017). Further studies are needed to disclose which factors influence the wait time-  
388 based reward anticipation signal we observe in the present task and which among them are responsible for  
389 the differences observed between adult and adolescent rats.

390 In summary, detailed analysis of behavior in a waiting task that promotes premature responding  
391 with an automatized action sequence shows a more impulsive behavior in adolescent rats. Unlike other  
392 tasks previously used to study neural correlates of waiting impulsivity (e.g., the 5-choice serial reaction

393 time task), the present task is learned rapidly, which makes it suitable for studying premature responding  
394 during rodent adolescence. Moreover, by requiring self-paced responding with a stereotyped action  
395 sequence, and making uncertain reward obtention during timely trials, the task generates conditions that  
396 “clamp” behavior. This allowed identifying a modulation of anticipatory striatal activity by time waited  
397 before responding, which grows with a steeper slope in adolescent rats, likely reflecting age-related  
398 changes in temporal discounting, internal urgency states or explore-exploit balance. Translational studies  
399 are necessary to understand if similarly designed tasks capture the relationship between impulsivity and  
400 automaticity in behavior that has been related to vulnerability to drug addiction.

## 401 **Materials and Methods**

### 402 **Subjects**

403 Subjects were adult male Long-Evans rats from our own colony (Adolescents: 4 weeks of age at  
404 the beginning of the experiments, weight ~120 g; Adults: 8-12 weeks of age at the beginning of the  
405 experiments, weight ~390 g), housed on a 12:12 light:dark cycle and experiments were performed during  
406 the light phase, 21° C room temperature. Rats were housed in groups of 3–4 in regular cages with wood  
407 shavings’ bedding and, after surgery, they were singly housed in 45 cm × 35 cm × 22 cm cages with  
408 moderate environmental enrichment (toys, tissue paper strips) and cardboard bedding. Two days before  
409 the beginning of the behavioral training subjects were deprived of water. All throughout the training  
410 schedule subjects had restricted access to water for 20 min each day and a-day rest period each week. This  
411 schedule maintained animals at 90% of their predeprivation weight, with any further weight loss being  
412 counteracted by increased free water access. All procedures complied with the National Institutes of  
413 Health Guide for Care and Use of Laboratory Animals (Publications No. 80-23, revised 1996) and were  
414 approved by the Animal Care and Use Committee of the School of Medicine of the University of Buenos  
415 Aires (CICUAL). Five adult males were part of the ITI 2.5 s experiments, three adult males were part of

416 the ITI 5s experiments (Fig. 2i and Fig. S1) and another three adult males were included in the ITI 2.5-5s  
417 experiments (Fig 4h-k, Fig. S2 -all except S2f, see below-). Three adolescent male were part of ITI 2.5 s  
418 experiments (Fig. 7, Fig S7-S9). Additionally two adult subjects were included in the accelerometer  
419 experiment (Fig. 4 and 6) and two others were only trained with the ITI 2.5 s protocol and did not undergo  
420 surgery (Fig. S2f).

## 421 **Electrodes**

422 Bundles of four microwire electrodes (12 $\mu$ m, tungsten, California fine wire company, USA, 0.2  
423 M $\Omega$  impedance) were attached to a homemade micromanipulator (Vandecasteele et al., 2012). Before  
424 surgery, the tetrode array was sterilized with 3 % oxygen peroxide solution (AIOSept  $\text{\textcircled{R}}$  PLUS TM). The  
425 array of 8 tetrodes was gradually lowered each day before training to find neuronal activity. At the end of  
426 the recording session the array was also lowered to change the recording site for the next training session  
427 (approximately 80  $\mu$ m each day). Before being implanted, the upper part of the tetrodes was painted with a  
428 DII solution (SCBT, sc-213424) to facilitate the visualization of the electrodes trace before the histological  
429 analysis.

## 430 **Surgery**

431 Before surgery, subjects were treated with local anaesthetic (lidocaine) in the scalp. Under deep  
432 anesthesia with isoflurane (3-4% for induction, 1-1.5% for maintenance), rats were placed in the  
433 stereotaxic frame and chronically implanted with an array of tetrodes aimed at the striatum (AP: +0.06 cm,  
434 L: -0.25 cm, DV: -0.35 cm). Body temperature was maintained using a heating pad. Through a small  
435 craniotomy performed in the corresponding area the tetrodes were then lowered to a depth of 3.5 mm. The  
436 micromanipulator was fixed in place with dental cement. Two stainless steel screws (0-80 X 1/8" Philips

437 Pan head) were inserted above the cerebellum to be used as ground and reference. Three additional steel  
438 screws were inserted to anchor the whole implant to the skull. The craniotomy was covered with a sterile  
439 50-50 mixture of mineral oil and paraffin. Towards the end of the surgical procedure, animals were treated  
440 with antibiotics (i.m., enrofloxacin 10 mg/kg) and a veterinary ointment (antiseptic, anti-inflammatory and  
441 anesthetic) was applied on the skin in contact with the external side of the implant to prevent microbial  
442 infections. Subjects were kept under careful observation until awakening. The first recording session  
443 followed 7 days of post-surgical recovery.

#### 444 **Behavioral training**

445 Rats were placed in a behavioral operant chamber that contained a 'nose-poke' at which they could  
446 seek the reward by licking through a slot onto a lick tube. Breaking an infrared beam in front of the nose-  
447 poke ended the inter-trial interval (ITI) and 200 ms after, the nose-poke was then illuminated for 100 ms  
448 (visual cue). Following the visual cue, licks were detected by breaking a second infrared beam. Upon  
449 licking the required number of times (8 licks), reward (~20  $\mu$ l of water) was made available on half of the  
450 trials on a pseudo-random fashion. Water reward was delivered through a tube with a solenoid attached to  
451 it. The behavioral task was controlled using an Arduino Uno board. Trials ended when the animal removed  
452 its head from the nose-poke. Sessions ended when the subject completed 300 trials or when it was reached  
453 a maximum training time of 120 min. Timely trials are those in which the subject entered the nosepoke  
454 after the required minimum waiting time. Premature trials are those in which the entrance beam was  
455 interrupted before having reached the minimum waiting time. Training sessions were classified into early  
456 or late as follows: having the animal reached a minimum of 80 % of timely trials with the complete 8-  
457 licks' sequence for two consecutive sessions, the following sessions were considered as "late" training  
458 sessions. After evaluating the total number of late training sessions, the same number of "early" sessions  
459 was selected upon the first training session, i.e: having counted 3 late sessions, the first three training

460 sessions were considered as “early” and the rest of the sessions between early and late were classified as  
461 “other”. All behavioral data is expressed as mean  $\pm$  SEM (except for reward rate figures, where the  
462 median is indicated, and Waiting time curves). Each dot corresponds to the average value of a session  
463 from a single animal.

#### 464 **Accelerometer experiment**

465 Two rats were trained daily in the nose-poke chamber until they reached a stable good performance  
466 (equivalent to “late” training sessions). Afterwards, a MPU-6050 accelerometer was chronically attached  
467 to their heads following a procedure similar to the electrodes’ implantation. Briefly, four stainless steel  
468 screws were inserted in the skull and the accelerometer was glued inside a cap made of a metallic mesh  
469 and dental acrylic that was anchored to the skull with dental cement. Subjects were left for one week of  
470 recovery before starting again with the behavioral training. Accelerometer data (sampling rate 25 Hz) was  
471 collected during each training session (9 sessions in total), using an Arduino UNO board connected to a  
472 PC via PLX-DAQ software (Parallax Inc.).

#### 473 **Histology**

474 Animals were given a lethal dose of ketamine xilazine and transcardially perfused with cold PBS  
475 containing heparin (500 U/L) followed by 4% PFA in PBS. The brain was quickly removed, postfixed in  
476 PFA at 4°C for 2–12 h, and placed in a 30% sucrose solution in PBS. Frozen coronal sections (50  $\mu$ m)  
477 were collected with a sliding microtome, and histological verification of the electrode endpoints and  
478 recording tracks was done in microscopy fluorescent pictures and later, sections were safranin-stained to  
479 confirm the visualization of the tracks.

480 Electrode positioning was considered “medial” when the tracks were found between 0 and 0.28 cm

481 relative to bregma and “lateral” from 0.28 cm onwards, considering bregma as starting point from center  
482 to right (Fig. S10).

## 483 **QUANTIFICATION AND STATISTICAL ANALYSIS**

### 484 **Neural recording and data analysis**

485 Brain activity and behavioral data were collected during the training sessions using commercially  
486 available hardware and software (sampling rate 32.5 kHz, Cheetah, Neuralynx). Neurophysiological and  
487 behavioral data were explored using NeuroScope (<http://neuroscope.sourceforge.net>; Hazan et al., 2006).  
488 Spike sorting was performed automatically, using KlustaKwik <http://klustawik.sourceforge.net>, followed  
489 by a manual adjustment of the clusters (using “Klusters” software package; <http://klusters.sourceforge.net>,  
490 Hazan et al., 2006). After the spike sorting procedure, all data was analyzed with MATLAB software  
491 using custom-built scripts. We registered a total of 867 units in adult rats: from the 2.5 s WT experiments  
492 there were 158 with no response and 244 were task responsive, from the 5 s WT experiments there were  
493 45 with no response and 47 were task responsive and from the 2.5-5 s WT experiments there were 79 with  
494 no response and 294 were task responsive. In adolescents we registered a total of 552 units, 233 with no  
495 response and 319 task responsive (2.5 s WT).

496 Peri-event time histograms (PETH) were created using an 80 ms bin. In order to compare between  
497 animals and cells each PETH was normalized using the mean and standard deviation ( $(X_i - X_{\text{mean}}) /$   
498  $X_{\text{sd}}$ ) calculated from a PETH of each cell centered on port entry +/- 20 s. All data is presented as  
499 normalized firing rate except for the peri-event examples. Only for display purposes, PETH were  
500 smoothed using a 5 points moving window.

501 In order to analyze the activity of each neuron for the different waiting times (WT), PETH were

502 constructed using trials with similar WT. The WT intervals limits were determined to include a similar  
503 number of port entries in each segment. Only 2.5 s and 5 s were fixed. The intervals used were (beginning,  
504 end; in ms): [451,1915; 1916,2499; 2500,3131; 3132,3803; 3804,4999; 5000,6084; 6085,8421;  
505 8422,12621; 12622,22013; 22014,1710755]. Trials with WT shorter than 450 ms were not included in the  
506 analysis.

507 A neuron was considered to be responsive to the port entry if the mean of the normalized firing  
508 rate (mnFR) was greater by 1SD to the mean. The mnFR was computed between 640 and 80 ms prior to  
509 the port entry. Similarly, a cell was considered to be responsive to the port exit if its mnFR between 240  
510 ms prior and 320 ms after port exit was greater than 1SD. A neuron was considered to be active during  
511 sequence execution (inside port cells) if its mnFR was  $> 1SD$  between 400 and 1520 ms after port entry.  
512 Neurons with an increase above 1 SD from port exit to 1 s before port entry, calculated for every waiting  
513 time interval, were labelled as tonically active. Visual cue responding cells were those whose mnFR was  $>$   
514 2SD between 160-400ms post port entry in those trials that had the visual cue. A neuron was included as  
515 active around lick number 3 or 8 if their mnFR was  $> 1 SD$  around the event ( $\pm 250ms$ ). Neurons with  
516 activity related to the reward were selected as follow: 1) their mnFR between 160-560 ms after the 8th lick  
517 should be greater to the activity during licking (-640 to -160 ms prior to 8th lick) by 0.5 SD and 2) their  
518 mnFR during 160-560 ms after the 8th lick was above 2 SD or rewarded timely trials or during  
519 unrewarded timely trials. We divided these neurons in three groups: a) with response in trials with reward  
520 (Fig. 5c), b) with response in timely trials with no reward, and activity higher in those trials than in timely  
521 rewarded trials by 1.5 SD (Fig. 5d), c) with response in premature trials not included in b (Fig. 5e).  
522 Relative mean normalized FR was calculated for each neuron considering average FR equal to 1 for the  
523 timely trials between 2,5 and 5 s and timely trials for the modified version of the task (Fig. 4k).  
524 Discrimination index for each selection of neurons was calculated as: absolute value of (mnFR in  
525 Unrewarded trials – mnFR in Premature trials, Figure 6g).

## 526 **Behavioral analysis**

527 All data was analyzed with MATLAB software using custom-built scripts. Waiting time  
528 histograms were calculated from the total number of entries (either early or late in training, with or  
529 without the 8-licks sequence) using 100 ms bins, normalized by its maximum so that the peak of the curve  
530 corresponded to a value of 1. Curves were smoothed with a 4 bin span. For the accelerometer recordings  
531 PETH were created using a 40 ms bin. Data collected from both animals was pooled and the normalized  
532 mean and 95 CI were calculated around the entry or exit port event +/- 2.5 s. Licks PETHs were  
533 constructed centered on port entry using a 10 ms bin and normalized to the mean and standard deviation of  
534 each session. All data is presented as normalized number of licks +/- SEM.

## 535 **Statistical analysis**

536 Statistical analysis of behavioral data was performed with Prism 8, Graphpad Software. All figures  
537 were made colorblind safe using palettes from ColorBrewer 2.0 (<http://colorbrewer2.org>). All early vs. late  
538 comparisons were done with repeated measures two-way ANOVA, except for reward rate in which  
539 Wilcoxon matched pairs test was used. To compare neuronal activity between Rewarded, Unrewarded and  
540 Premature groups, repeated measures one-way ANOVA was used. To compare licking activity between  
541 Rewarded, Unrewarded and Premature trials Mixed-effects model (Restricted Maximum Likelihood test,  
542 REML) was used. The performance of adults trained with a 5 s criterion time was analyzed at the late  
543 stage of training using Mann Whitney Test. Localization of the neurons and their activity at the entry or  
544 exit was analyzed using Three-way ANOVA. Linear regression was used to analyze premature trials and  
545 the reward rate. A general linear model was used to compare neuronal activity from adult and adolescent  
546 rats. Model: Neuronal response ~ intercept + waiting time x age (as factor), using a Gaussian distribution.



## 547 **Acknowledgments**

548 We thank Dr. Juan Belforte for helpful discussions and also Yamila Páez for her technical  
549 assistance with animal welfare. This project was funded with research grants from FONCYT (PICT 2016-  
550 0396; PICT 2017-0520; PICT 2017-2465) and UBACYT (2018-2020 305BA).

## 551 **Author contributions**

552 Conceptualization G.M., M.B./ Methodology M.B., C.M., C.Z./ Software M.B., C.M./ Formal  
553 Analysis M.B., C.M., G.M./ Investigation C.M., M.B./ Resources G.M.,M.B./ Data Curation M.B./  
554 Visualization C.M., M.B. / Writing –Original Draft G.M., C.Z./ Writing –Review & Editing C.Z., M.B.,  
555 C.M./ Project Administration G.M., M.B./ Funding Acquisition G.M., M.B., C.M.

## 556 **Declaration of interests**

557 The authors declare no competing interests.

## 558 **Lead Contact**

559 Further information and requests for resources and reagents should be directed to and will be  
560 fulfilled by the Lead Contact, Mariano Belluscio. All the code used for data analysis in this paper will be  
561 shared by the lead contact upon written request. Data is reported in

## 562 **Figure Legends**

563 **Figure 1. Rats become skilled in the task. (a)** Training cage with the nose-poke. Animals' entries and  
564 exits from the nose-poke are detected with two infra-red beams. A visual cue of 100 ms is given with a  
565 pair of green LEDs placed inside the nose-poke to indicate a timely entry. **(b)** Schematic representation of  
566 the different types of trials. Timely trials require a minimum waiting time of 2.5 s and Premature trials are  
567 those in which the minimum waiting time is not met. After that, trials are classified by whether animals  
568 performed an 8-lick sequence or not. **(c)** Top: Representative diagram of the electrodes' positioning, aimed  
569 at the dorsal striatum. Bottom: Histological section (AP=0.24 cm from bregma) with the traces of the  
570 electrodes painted with DII. **(d)** Percentage of the different trial types per session, timely trials with an 8-  
571 lick sequence (Tx8L) or not (T<8L) and premature trials with an 8-lick sequence (Px8L) or not (P<8L).  
572 **(e)** Reward rates for early and late training stages. Trial duration **(f)**, latency to the first lick during correct  
573 trials **(g)** and time to complete the 8-lick sequence **(h)** for the two types of correct trials (rewarded and  
574 unrewarded), at each training stage.

575 **Figure 2. Training does not suppress premature initiations of the learned behavioral response. a)**  
576 Correlation between prematurely initiated trials and reward rate ( $Y = -0.023 * X + 1.921$ , slope  
577 significantly different from zero  $p=0.0176$ , R square 0.09031.). Proportion of trials **(b)**, time to complete  
578 the 8-lick sequence **(c)**, latency to first lick **(d)** variation coefficient **(e)** of the 8-lick sequence inter-lick  
579 intervals for prematurely and timely initiated trials, at early and late learning stages. **f)** Correlation  
580 between percentage of prematurely initiated trials followed by an 8-lick sequence and reward rate ( $Y =$   
581  $0.024 * X - 0.0408$ , slope significantly different from zero,  $p < 0.0001$ , R square 0.5016.). **g-i)** Normalized  
582 frequency distributions of the trial initiation times (waiting time), separated for trials with (gray) and  
583 without (dotted line) 8-lick sequences, and for early **(g)** and late **(h)** training stages. Insets: percentage of  
584 the trials with (gray) and without (dotted line) 8-lick sequences for each bin, zoomed around the criterion  
585 time. **i)** Rats were trained with a 5 s criterion time period (blue) and afterwards were switched to a 2.5 s

586 criterion time for the following two sessions (48 h after the last 5s-WT session, light blue). Dotted lines:  
587 criterion time; bin size: 100 ms; reference for normalization: bin with highest value = 1).

588 **Figure 3. Striatal activity marks transitions between behavioral states of the task. a)** Representative  
589 raster plots and PETH of striatal units showing firing rate modulations related to port entry and/or port  
590 exit. **b)** Individual PETHs of all the recorded striatal neurons during correct trials, aligned to port entry  
591 (left) or port exit (right), with corresponding average PETH (below). Color code for the normalized  
592 activity is shown on the right. **c)** Proportion of neurons showing task-related firing rate modulations. **d-g)**  
593 Individual and average PETH and average firing rates aligned to port entry (left panels) and to port exit  
594 (right panels) for **d)** striatal neurons showing only port entry related activity, **e)** striatal neurons showing  
595 only port exit related activity, **f)** striatal neurons showing activity modulations at both port entry and port  
596 exit and **g)** striatal neurons showing higher activity while animals are inside the port. In d to g, it is  
597 represented the mean (solid lines) and SE (shaded area). Colored bars over the x axis show the interval  
598 used to detect firing rate modulations (red: entry, orange: exit, purple: active during the task).

599 **Figure 4. Prematurely initiated trials are preceded by low anticipatory activity. (a)** Average PETH of  
600 entry-related neurons, during premature and timely trials, for trials with or without an 8-lick sequence  
601 (diagram on top shows the types of trials analyzed). **(b)** Average striatal activity corresponding to the  
602 PETH shown in a. **(c)** Accelerometer recordings of head movements around port entry for premature and  
603 timely trials. It is represented the mean (solid lines) and 95 CI (shaded area). Data was obtained from a  
604 total of 9 training sessions of two animals. **(d)** Average PETH of striatal neurons showing entry-related  
605 activity around port entry sorted by waiting time duration. Color code for the intervals shown on the right.  
606 **(e)** Mean normalized firing rate for each of the waiting time segments, 2.5 s criterion time is shown with a  
607 blue hatched-line. **(f)** Average PETH of the same striatal neurons segmented according to next trial waiting

608 time. **(g)** Average PETH of striatal neurons showing activation at port exit segmented as in **(d)**. **(h)**  
609 Schematic representation of the different types of trials in a modified version of the task. Timely trials:  
610 waiting time 2.5 – 5 s, Premature: waiting time <2.5 s, Late: waiting time >5 s. **(i)** Proportion of trials  
611 followed by 8-lick sequences for each type of trial. **(j)** Average PETH of striatal neurons showing activity  
612 preceding port entry according to the waiting time duration. Color code for the intervals shown on the  
613 right. **(k)** Relative mean normalized firing rate for each of the waiting time groups for both variants of the  
614 task.

615 **Figure 5. Reward responsive neurons discriminate prematurely from timely initiated trials. (a)**  
616 Schematic representation of the different types of trials analyzed. **(b)** Average PETH of striatal units  
617 showing firing rate modulations related to the licking activity (1st, 3rd and 8th lick). It is represented the  
618 mean (solid lines) and SE. **(c-e)** individual and average PETHs of striatal units, aligned to 8th lick (time 0  
619 s), showing positive firing rate modulations during reward delivery **(c)**, reward omission **(d)** and  
620 premature trials **(e)**. **(f)** Mean normalized firing rate for the different trial conditions, from top to bottom:  
621 reward delivery, reward omission and premature trials. **(g)** Discrimination index for each of the groups of  
622 neurons shown in **(c-e)**. **(h)** PETH showing lick rates during the three trial conditions, centered at the 8th  
623 lick, with its corresponding average at the bottom. Color code for the normalized activity is shown on the  
624 right.

625 **Figure 6. Striatal activity at the exit reports the performance of the action sequence. (a)** Average  
626 PETH of neurons responding to port exit, during premature and timely trials, for trials with an 8-lick  
627 sequence and trials where less than 8 licks were emitted (diagram on top shows the types of trials  
628 analyzed). **(b)** Average striatal activity corresponding to the PETH shown in a. **(c)** PETH of head  
629 acceleration around port exit in premature and timely trials. It is represented the mean (solid lines) and 95

630 CI (shaded area).

631 **Figure 7. Adolescent rats become skilled in the task and show a higher modulatory response. (a)**

632 Percentage of the different trial types per session. **(b)** Reward rates for each training stage. **(c)** Proportion

633 of trials followed by 8-lick sequences at early and late learning stages. **(d)** Correlation between percentage

634 of prematurely initiated trials followed by an 8-lick sequence and reward rate ( $Y=0.026*X +0.112$ , Slope

635 significantly different from zero,  $p<0.0001$ , R square 0.7133.). **(e)** Normalized frequency distributions of

636 the trial initiation times (waiting time), separated for trials with (dark gray) and without (light gray dotted

637 line) 8-lick sequences, in the late of training. Inset: percentage of the trials with and without 8-lick

638 sequences for each bin, zoomed around the criterion time. **(f)** Ratio between premature trials made and

639 obtained rewards for adolescents and adults. **(g)** Premature trials with 8-lick sequence made per obtained

640 rewards for adolescents and adults. **(h)** Accumulated normalized trials vs. Waiting time for adolescents

641 (mean: red, individual session: light red) and adults (mean: black, individual session: gray). **(i)** Percentage

642 of neurons showing task-related firing rate modulations. **(j)** Mean normalized FR vs. waiting time for both

643 ages. 2.5 s criterion time is shown with a blue hatched-line. **(k)** Discrimination index calculated at the time

644 of reward delivery. **(l)** Mean normalized FR at the time of exit for trials with or without 8-lick sequence

645 for both ages. j-l: hatched lines correspond to adolescents and full lines to adults.

646 **Supplementary Figure 1. Rats trained with a longer ITI also emit premature learned responses. (a)**

647 Reward rates for each training stage of rats trained with a 5s ITI requirement Wilcoxon matched-pairs

648 signed rank test \*\*  $p=0.0078$ . **(b)** Proportion of trials followed by 8-lick sequences at early and late

649 learning stages, Two-way RM ANOVA, Type of trial \*\*\*  $p<0.0001$ , Interaction Training stage x Type of

650 trial \*  $p=0.0535$ . **(c)** Time to complete the 8-lick sequence, Mann Whitney Test  $p=0.4894$ . **(d)** Latency to

651 first lick for prematurely and timely initiated trials, at early and late learning stages, Mann Whitney Test

652  $p=0.8633$ . **(e)** Variation coefficient of the 8-lick sequence inter-lick intervals for prematurely and timely  
653 initiated trials, at early and late learning stages, Mann Whitney Test NS  $p=0.8633$ . **(f)** Correlation between  
654 prematurely initiated trials and reward rate, Linear regression  $Y=-0.02755*X +2.776$ , Slope significantly  
655 different from zero:  $p=0.0020$ , R-square=0.3343. **(g)** Correlation between percentage of prematurely  
656 initiated trials followed by an 8-lick sequence and reward rate, Linear regression  $Y=0.01321*X +0.5469$ ,  
657 Slope significantly different from zero:  $p=0.0192$ , R-square=0.2080. **(h)** Normalized frequency  
658 distributions of the trial initiation times (waiting time), separated for trials with (gray) and without (dotted  
659 line) 8-lick sequences, in the late of training. Inset: percentage of the trials with (gray) and without (dotted  
660 line) 8-lick sequences for each bin, zoomed around the criterion time.

661 **Supplementary Figure 2. Rats also learn a task with lower and upper limits in the WT.** Rats were  
662 trained to enter the nosepoke within a minimum WT of 2.5 s and a maximum WT of 5. **(a)** Reward rates  
663 for the 2.5-5 s WT task, \*\*\*  $p<0.0001$  Wilcoxon Signed rank test. **(b)** Trial duration for correct trials,  
664 Paired t test \*\*\* $p<0.0001$ . **(c)** Latency to first lick for prematurely, timely and late initiated trials, One-  
665 way RM ANOVA NS,  $p=0.6053$ . **(d)** Time to complete the 8-lick sequence for the different types of trials,  
666 One-way RM ANOVA NS,  $p=0.5593$ . **(e)** Variation coefficient of the 8-lick sequence inter-lick intervals  
667 for the different types of trials, One-way RM ANOVA NS,  $p=0.6407$ . **(f)** Normalized frequency  
668 distributions of the trial initiation times (waiting time), separated for trials with 8-lick sequences in the  
669 third (dark blue) and the seventh (light blue) sessions of training with a 2.5 s WT. Inset: area below the  
670 curve calculated between 2.5 s and 5 s for sessions 3 and 4 vs. sessions 6 and 7, Mann- Whitney test, NS,  
671  $p=0.8857$ . **(g)** Normalized frequency distributions of the trial initiation times (waiting time), separated for  
672 trials with 8-lick sequences in the third (lilac) and the seventh (purple) sessions of training with a 2.5-5  
673 WT. Inset: area below the curve calculated between 2.5 s and 5 s for sessions 3 and 4 vs. sessions 6 and 7,  
674 Mann- Whitney test \*  $p=0.0238$ .

675 **Supplementary Figure 3. Characteristics of the neurons registered in the 2.5 s WT task. (a)** Average  
676 firing rate of striatal neurons showing tonic activity during the waiting period, aligned to port entry or port  
677 exit, for different waiting times. Color code for the normalized (in units of standard deviation) activity is  
678 shown on the left. **(b)** Proportion of different responses in both training stages from animals trained with a  
679 2.5 s criterion time.

680 **Supplementary Figure 4. Striatal activity at the boundaries of the trials. (a)** Anticipatory activity of  
681 entry responsive neurons and neuronal localization. Average striatal activity shown in the right panel.  
682 Three-way ANOVA, Localization  $p=0.0005$ , Training stage \*\*\*  $p<0.0001$ , Licks' sequence  $p=0.0851$ ,  
683 Interaction Localization x Training stage \*\*\*  $p<0.0001$ , Interaction Localization x Licks' sequence  
684  $p=0.1999$ , Interaction Training stage x Licks' sequence  $p=0.2842$ , Interaction Training stage x Licks'  
685 sequence x Localization \*\*\*  $p=0.0006$ . **(b)** Anticipatory activity of entry-exit responsive neurons and  
686 neuronal localization. Average striatal activity shown in the right panel. Three-way ANOVA, Localization  
687  $p=0.1824$ , Training stage \*\*\*  $p<0.0001$ , Licks' sequence  $p=0.1751$ , Interaction Localization x Training  
688 stage \*\*\*  $p<0.0001$ , Interaction Localization x Licks' sequence  $p=0.0501$ , Interaction Training stage x  
689 Licks' sequence  $p=0.5239$ , Interaction Training stage x Licks' sequence x Localization  $p=0.0178$ . **(c)**  
690 Activity at port exit of exit responsive neurons and neuronal localization. Average striatal activity shown  
691 in the right panel. Three-way ANOVA, Localization  $p=0.9256$ , Training stage \*\*\*  $p=0.0007$ , Licks'  
692 sequence \*\*\*  $p<0.0001$ , Interaction Localization x Training stage  $p=0.0511$ , Interaction Localization x  
693 Licks' sequence  $p=0.5469$ , Interaction Training stage x Licks' sequence \*\*\*  $p<0.0001$ , Interaction  
694 Training stage x Licks' sequence x Localization \*\*  $p=0.0022$ . **(d)** Activity at port exit of entry-exit  
695 responsive neurons and neuronal localization. Average striatal activity shown in the right panel. Three-  
696 way ANOVA, Localization  $p=0.6139$ , Training stage  $p=0.1512$ , Licks' sequence \*\*\*  $p=0.0005$ , Interaction

697 Localization x Training stage  $p=0.9700$ , Interaction Localization x Licks' sequence  $p=0.6973$ , Interaction  
698 Training stage x Licks' sequence  $p=0.5116$ , Interaction Training stage x Licks' sequence x Localization  
699  $p=0.6400$ .

700 **Supplementary Figure 5. Anticipatory activity in the 5s WT task. (a)** Average firing rates of striatal  
701 neurons (of rats trained with a 5 s criterion time) showing activity preceding the initiation of the trials  
702 according to the waiting time duration. Color code for the intervals shown on the right. **(b)** Mean of the  
703 normalized firing rate for each of the waiting time groups, calculated between -640 and -80 ms before the  
704 entrance vs. waiting time, criterion time is shown with a blue hatched-line.

705 **Supplementary Figure 6. Neuronal activity at the moment of the visual cue.** Population PETH and  
706 Average firing rates of striatal units showing positive firing rate modulations related with the visual cue.  
707 Color code for the mnFR is shown on the right. Below, bar graphs showing statistical comparisons  
708 between trial conditions. One-way RM ANOVA \*\*\*  $p<0.0001$ , Tukey's multiple comparisons test \*\*\*  
709  $p=0.0002$  Premature vs. the other groups.

710 **Supplementary Figure 7. Adolescent rats make more premature trials. (a)** Trial duration for correct  
711 trials at each training stage, Two-way RM ANOVA, Training stage \*\*\*  $p=0.0002$ , Type of trial \*\*  
712  $p=0.0072$ . **(b)** Latency to the first lick during correct trials, Two-way RM ANOVA, Training stage \*\*\*  
713  $p=0.0007$ . **(c)** Time to complete the 8-lick sequence, Two-way RM ANOVA, Training stage \*\*\*  $p<0.0001$ .  
714 **(d)** Correlation between prematurely initiated trials and reward rate, Linear regression  $Y=-0.002263 *X$   
715  $+1.504$ , Slope significantly different from zero:  $p=0.8492$ , R-square= 0.0077. **(e)** Time to complete the 8-  
716 lick sequence, Two-way RM ANOVA, Training stage \*\*\*  $p=0.0005$ . **(f)** Latency to first lick for



717 prematurely and timely initiated trials, at early and late learning stages, Two-way RM ANOVA, Training  
718 stage \*\*  $p=0.0045$ . **(g)** Variation coefficient of the 8-lick sequence inter-lick intervals for prematurely and  
719 timely initiated trials, at early and late learning stages, Two-way RM ANOVA, Training stage \*\* $p=0.0034$ ,  
720 Interaction Training stage x Type of trial  $p=0.0013$ .

721 **Supplementary Figure 8. Striatal activity also marks transitions between behavioral states of the**  
722 **task in adolescent animals. (a)** Representative raster plots and PETH of striatal units showing firing rate  
723 modulations related to port entry and/or port exit. **(b)** Proportion of neurons showing task related firing  
724 rate modulations. **(c-f)** Population PETH and average firing rates aligned to port entry (top panels) and to  
725 port exit (bottom panels) for **(c)** striatal neurons showing only port entry related activity, **(d)** striatal  
726 neurons showing only port exit related activity, **(e)** striatal neurons showing activity modulations at both  
727 port entry and port exit and **(f)** striatal neurons showing higher activity during licking behavior. In **(c)** to  
728 **(f)**, it is represented the mean (solid lines) and SE (shaded area). Colored bars over the x axis show the  
729 interval used to detect firing rate modulations (red: entry, orange: exit, purple: active during the task).  
730 Color code for the mnFR is shown on the right **(a)**.

731 **Supplementary Figure 9. Anticipatory, reward responsive and exit activity in striatal neurons of**  
732 **adolescent rats. (a)** Average firing rate of entry-related neurons responding at port entry, during timely  
733 and premature trials, for trials with an 8-lick sequence and trials where less than 8 licks were emitted  
734 (diagram on top shows the types of trials analyzed). It is represented the mean (solid lines) and SE (shaded  
735 area). Colored bars over the x axis show the interval used to detect firing rate modulations (-640 to -80  
736 ms). **(b)** Average striatal activity corresponding to the PETH shown in a. **(c)** Population PETH and  
737 Average firing rates of striatal units showing positive firing rate modulations during reward delivery,  
738 reward omission and premature trials. Below, bar graphs showing statistical comparisons between trial

739 conditions. **(d)** PETH showing lick rates during the three trial conditions, centered at the 8th lick, with its  
740 corresponding average and statistical analysis at the bottom. **(e)** Discrimination index for each of the  
741 groups of neurons shown in b-d, Mixed-effects model (REML) \*  $p=0.0164$ . **(f)** PETH showing lick rates  
742 during the three trial conditions, centered at the 8th lick, with its corresponding average at the bottom.  
743 Color code for the normalized activity is shown on the right. **(g)** Average firing rate of neurons responding  
744 to port exit, during premature and timely trials, for trials with an 8-lick sequence and trials where less than  
745 8 licks were emitted. **(h)** Average striatal activity corresponding to the PETH shown in g, Two-way RM  
746 ANOVA, Licks' sequence \*\*\*  $p<0.0001$ .

747 **Supplementary Figure 10. Localization of recording tetrodes.** Schematic representation of the  
748 electrodes' placement for each of the animals, based on the electrode tips visible in the histological  
749 analysis, adapted from Paxinos' Atlas (Paxinos and Watson, 2007). Animals with incorrect electrode  
750 placement (gray squares) were excluded from the electrophysiological analysis but not from the  
751 behavioral analysis.

## 752 **References**

- 753 Addicott, M.A., Pearson, J.M., Sweitzer, M.M., Barack, D.L., and Platt, M.L. (2017). A Primer on  
754 Foraging and the Explore/Exploit Trade-Off for Psychiatry Research. *Neuropsychopharmacology* 42,  
755 1931–1939.
- 756 Andrzejewski, M.E., Schochet, T.L., Feit, E.C., Harris, R., McKee, B.L., and Kelley, A.E. (2011). A  
757 comparison of adult and adolescent rat behavior in operant learning, extinction, and behavioral inhibition  
758 paradigms. *Behav. Neurosci.* 125, 93–105.
- 759 Asaad, W.F., Lauro, P.M., Perge, J.A., and Eskandar, E.N. (2017). Prefrontal Neurons Encode a Solution  
760 to the Credit-Assignment Problem. *J. Neurosci.* 37, 6995–7007.
- 761 Atallah, H.E., McCool, A.D., Howe, M.W., and Graybiel, A.M. (2014). Neurons in the ventral striatum  
762 exhibit cell-type-specific representations of outcome during learning. *Neuron* 82, 1145–1156.

- 763 Bakhurin, K.I., Goudar, V., Shobe, J.L., Claar, L.D., Buonomano, D. V., and Masmanidis, S.C. (2017).  
764 Differential Encoding of Time by Prefrontal and Striatal Network Dynamics. *J. Neurosci.* 37, 854–870.
- 765 Balleine, B.W., and Dickinson, A. (1998). Goal-directed instrumental action: contingency and incentive  
766 learning and their cortical substrates. *Neuropharmacology* 37, 407–419.
- 767 Bari, A., and Robbins, T.W. (2013). Inhibition and impulsivity: behavioral and neural basis of response  
768 control. *Prog. Neurobiol.* 108, 44–79.
- 769 Barnes, T.D., Kubota, Y., Hu, D., Jin, D.Z., and Graybiel, A.M. (2005). Activity of striatal neurons reflects  
770 dynamic encoding and recoding of procedural memories. *Nature* 437, 1158–1161.
- 771 Baumann, A.A., and Odum, A.L. (2012). Impulsivity, risk taking, and timing. *Behav. Processes* 90, 408–  
772 414.
- 773 Belin, D., and Everitt, B.J. (2008). Cocaine seeking habits depend upon dopamine-dependent serial  
774 connectivity linking the ventral with the dorsal striatum. *Neuron* 57, 432–441.
- 775 Bonner, A.C., and Borrero, J.C. (2018). Differential Reinforcement of Low Rate Schedules Reduce Severe  
776 Problem Behavior. *Behav. Modif.* 42, 747–764.
- 777 Buckholtz, J.W., Treadway, M.T., Cowan, R.L., Woodward, N.D., Benning, S.D., Li, R., Ansari, M.S.,  
778 Baldwin, R.M., Schwartzman, A.N., Shelby, E.S., et al. (2010). Mesolimbic dopamine reward system  
779 hypersensitivity in individuals with psychopathic traits. *Nat. Neurosci.* 13, 419–421.
- 780 Buhusi, C. V, and Meck, W.H. (2005). What makes us tick? Functional and neural mechanisms of interval  
781 timing. *Nat. Rev. Neurosci.* 6, 755–765.
- 782 Carland, M.A., Thura, D., and Cisek, P. (2019). The Urge to Decide and Act: Implications for Brain  
783 Function and Dysfunction. *Neuroscientist* 25, 491–511.
- 784 Costa, R.M. (2011). A selectionist account of de novo action learning. *Curr. Opin. Neurobiol.* 21, 579–  
785 586.
- 786 Dalley, J.W., and Robbins, T.W. (2017). Fractionating impulsivity: neuropsychiatric implications. *Nat.*  
787 *Rev. Neurosci.* 18, 158–171.
- 788 Daw, N.D., Niv, Y., and Dayan, P. (2005). Uncertainty-based competition between prefrontal and  
789 dorsolateral striatal systems for behavioral control. *Nat. Neurosci.* 8, 1704–1711.
- 790 Donnelly, N.A., Holtzman, T., Rich, P.D., Nevado-Holgado, A.J., Fernando, A.B.P., Van Dijck, G.,  
791 Holzhammer, T., Paul, O., Ruther, P., Paulsen, O., et al. (2014). Oscillatory activity in the medial  
792 prefrontal cortex and nucleus accumbens correlates with impulsivity and reward outcome. *PLoS One* 9,  
793 e111300.
- 794 Emmons, E.B., De Corte, B.J., Kim, Y., Parker, K.L., Matell, M.S., and Narayanan, N.S. (2017). Rodent  
795 Medial Frontal Control of Temporal Processing in the Dorsomedial Striatum. *J. Neurosci.* 37, 8718–8733.

- 796 Engeln, M., Ansquer, S., Dugast, E., Bezard, E., Belin, D., and Fernagut, P.-O. (2016). Multi-facetted  
797 impulsivity following nigral degeneration and dopamine replacement therapy. *Neuropharmacology* *109*,  
798 69–77.
- 799 Ersche, K.D., Ward, L.H.E., Lim, T.-V., Lumsden, R.J., Sawiak, S.J., Robbins, T.W., and Stochl, J. (2019).  
800 Impulsivity and compulsivity are differentially associated with automaticity and routine on the Creature of  
801 Habit Scale. *Pers. Individ. Dif.* *150*, 109493.
- 802 Evenden, J.L. (1998). The pharmacology of impulsive behaviour in rats III: the effects of amphetamine,  
803 haloperidol, imipramine, chlordiazepoxide and ethanol on a paced fixed consecutive number schedule.  
804 *Psychopharmacology (Berl)*. *138*, 295–304.
- 805 Everitt, B.J., Belin, D., Economidou, D., Pelloux, Y., Dalley, J.W., and Robbins, T.W. (2008). Review.  
806 Neural mechanisms underlying the vulnerability to develop compulsive drug-seeking habits and addiction.  
807 *Philos. Trans. R. Soc. Lond. B. Biol. Sci.* *363*, 3125–3135.
- 808 Floresco, S.B., St Onge, J.R., Ghods-Sharifi, S., and Winstanley, C.A. (2008). Cortico-limbic-striatal  
809 circuits subserving different forms of cost-benefit decision making. *Cogn. Affect. Behav. Neurosci.* *8*,  
810 375–389.
- 811 Geddes, C.E., Li, H., and Jin, X. (2018). Optogenetic Editing Reveals the Hierarchical Organization of  
812 Learned Action Sequences. *Cell* *174*, 32-43.e15.
- 813 Gibbon, J. (1977). Scalar expectancy theory and Weber’s law in animal timing. *Psychol. Rev.* *84*, 279–  
814 325.
- 815 Gillan, C.M., Robbins, T.W., Sahakian, B.J., van den Heuvel, O.A., and van Wingen, G. (2016a). The role  
816 of habit in compulsivity. *Eur. Neuropsychopharmacol.* *26*, 828–840.
- 817 Gillan, C.M., Kosinski, M., Whelan, R., Phelps, E.A., and Daw, N.D. (2016b). Characterizing a  
818 psychiatric symptom dimension related to deficits in goal-directed control. *Elife* *5*.
- 819 Gouvêa, T.S., Monteiro, T., Motiwala, A., Soares, S., Machens, C., and Paton, J.J. (2015). Striatal  
820 dynamics explain duration judgments. *Elife* *4*.
- 821 Graybiel, A.M. (1998). The Basal Ganglia and Chunking of Action Repertoires. *Neurobiol. Learn. Mem.*  
822 *70*, 119–136.
- 823 Graybiel, A.M. (2008). Habits, rituals, and the evaluative brain. *Annu Rev Neurosci* *31*, 359–387.
- 824 Green, L., Myerson, J., and Ostaszewski, P. (1999). Discounting of delayed rewards across the life span:  
825 age differences in individual discounting functions. *Behav. Processes* *46*, 89–96.
- 826 Gremel, C.M., and Costa, R.M. (2013). Orbitofrontal and striatal circuits dynamically encode the shift  
827 between goal-directed and habitual actions. *Nat. Commun.* *4*, 2264.
- 828 Hamid, A.A., Frank, M.J., and Moore, C.I. (2021). Wave-like dopamine dynamics as a mechanism for  
829 spatiotemporal credit assignment. *Cell* *184*, 2733-2749.e16.

- 830 Hazan, L., Zugaro, M., and Buzsáki, G. (2006). Klusters, NeuroScope, NDManager: A free software suite  
831 for neurophysiological data processing and visualization. *J. Neurosci. Methods* *155*, 207–216.
- 832 Her, E.S., Huh, N., Kim, J., and Jung, M.W. (2016). Neuronal activity in dorsomedial and dorsolateral  
833 striatum under the requirement for temporal credit assignment. *Sci. Rep.* *6*, 27056.
- 834 Hikosaka, O., Nakahara, H., Rand, M.K., Sakai, K., Lu, X., Nakamura, K., Miyachi, S., and Doya, K.  
835 (1999). Parallel neural networks for learning sequential procedures. *Trends Neurosci.* *22*, 464–471.
- 836 Histed, M.H., Pasupathy, A., and Miller, E.K. (2009). Learning substrates in the primate prefrontal cortex  
837 and striatum: sustained activity related to successful actions. *Neuron* *63*, 244–253.
- 838 Hogarth, L., Chase, H.W., and Baess, K. (2012). Impaired goal-directed behavioural control in human  
839 impulsivity. *Q. J. Exp. Psychol.* *65*, 305–316.
- 840 Jin, X., and Costa, R.M. (2010). Start/stop signals emerge in nigrostriatal circuits during sequence  
841 learning. *Nature* *466*, 457–462.
- 842 Jin, X., Tecuapetla, F., and Costa, R.M. (2014). Basal ganglia subcircuits distinctively encode the parsing  
843 and concatenation of action sequences. *Nat. Neurosci.* *17*, 423–430.
- 844 Jog, M.S. (1999). Building Neural Representations of Habits. *Science* (80-. ). *286*, 1745–1749.
- 845 Kamphuis, J., Baichel, S., Lancel, M., de Boer, S.F., Koolhaas, J.M., and Meerlo, P. (2017). Sleep  
846 restriction in rats leads to changes in operant behaviour indicative of reduced prefrontal cortex function. *J.*  
847 *Sleep Res.* *26*, 5–13.
- 848 Kim, H., Sul, J.H., Huh, N., Lee, D., and Jung, M.W. (2009). Role of Striatum in Updating Values of  
849 Chosen Actions. *J. Neurosci.* *29*, 14701–14712.
- 850 Knowlton, B.J., and Patterson, T.K. (2016). Habit Formation and the Striatum. *Curr. Top. Behav.*  
851 *Neurosci.* *37*, 275–295.
- 852 Kubota, Y., Liu, J., Hu, D., DeCoteau, W.E., Eden, U.T., Smith, A.C., and Graybiel, A.M. (2009). Stable  
853 encoding of task structure coexists with flexible coding of task events in sensorimotor striatum. *J.*  
854 *Neurophysiol.* *102*, 2142–2160.
- 855 Lauwereyns, J., Watanabe, K., Coe, B., and Hikosaka, O. (2002). A neural correlate of response bias in  
856 monkey caudate nucleus. *Nature* *418*, 413–417.
- 857 Lennox, D.B., Miltenberger, R.G., and Donnelly, D.R. (1987). Response interruption and DRL for the  
858 reduction of rapid eating. *J. Appl. Behav. Anal.* *20*, 279–284.
- 859 Lovic, V., Keen, D., Fletcher, P.J., and Fleming, A.S. (2011). Early-life maternal separation and social  
860 isolation produce an increase in impulsive action but not impulsive choice. *Behav. Neurosci.* *125*, 481–  
861 491.
- 862 Martiros, N., Burgess, A.A., and Graybiel, A.M. (2018). Inversely Active Striatal Projection Neurons and  
863 Interneurons Selectively Delimit Useful Behavioral Sequences. *Curr. Biol.* *28*, 560-573.e5.

- 864 Matell, M.S., Meck, W.H., and Nicolelis, M.A.L. (2003). Interval timing and the encoding of signal  
865 duration by ensembles of cortical and striatal neurons. *Behav. Neurosci.* *117*, 760–773.
- 866 Mello, G.B.M., Soares, S., and Paton, J.J. (2015). A scalable population code for time in the striatum.  
867 *Curr. Biol.* *25*, 1113–1122.
- 868 Monterosso, J., and Ainslie, G. (1999). Beyond discounting: possible experimental models of impulse  
869 control. *Psychopharmacology (Berl.)* *146*, 339–347.
- 870 Namboodiri, V.M., and Hussain Shuler, M.G. (2016). The hunt for the perfect discounting function and a  
871 reckoning of time perception. *Curr. Opin. Neurobiol.* *40*, 135–141.
- 872 Namboodiri, V.M.K., Mihalas, S., Marton, T.M., and Hussain Shuler, M.G. (2014). A general theory of  
873 intertemporal decision-making and the perception of time. *Front. Behav. Neurosci.* *8*.
- 874 Neill, D.B. (1976). Frontal-striatal control of behavioral inhibition in the rat. *Brain Res.* *105*, 89–103.
- 875 Nonomura, S., Nishizawa, K., Sakai, Y., Kawaguchi, Y., Kato, S., Uchigashima, M., Watanabe, M.,  
876 Yamanaka, K., Enomoto, K., Chiken, S., et al. (2018). Monitoring and Updating of Action Selection for  
877 Goal-Directed Behavior through the Striatal Direct and Indirect Pathways. *Neuron* *99*, 1302-1314.e5.
- 878 Paxinos, G., and Watson, C. (2007). *The Rat Brain in Stereotaxic Coordinates, Sixth Edition* (Academic  
879 Press).
- 880 Peterson, J.D., Wolf, M.E., and White, F.J. (2003). Impaired DRL 30 performance during amphetamine  
881 withdrawal. *Behav. Brain Res.* *143*, 101–108.
- 882 Robbins, T.W., and Costa, R.M. (2017). Habits. *Curr. Biol.* *27*, R1200–R1206.
- 883 Rueda-Orozco, P.E., and Robbe, D. (2015). The striatum multiplexes contextual and kinematic  
884 information to constrain motor habits execution. *Nat. Neurosci.* *18*, 453–460.
- 885 Samejima, K., Ueda, Y., Doya, K., and Kimura, M. (2005). Representation of action-specific reward  
886 values in the striatum. *Science* *310*, 1337–1340.
- 887 Scheres, A., Dijkstra, M., Ainslie, E., Balkan, J., Reynolds, B., Sonuga-Barke, E., and Castellanos, F.X.  
888 (2006). Temporal and probabilistic discounting of rewards in children and adolescents: effects of age and  
889 ADHD symptoms. *Neuropsychologia* *44*, 2092–2103.
- 890 Schultz, W. (2015). Neuronal Reward and Decision Signals: From Theories to Data. *Physiol. Rev.* *95*,  
891 853–951.
- 892 Shin, J.H., Kim, D., and Jung, M.W. (2018). Differential coding of reward and movement information in  
893 the dorsomedial striatal direct and indirect pathways. *Nat. Commun.* *9*, 404.
- 894 Singer, H.S. (2016). Habitual and goal-directed behaviours and Tourette syndrome. *Brain* *139*, 312–316.
- 895 Smith, K.S., and Graybiel, A.M. (2013). A dual operator view of habitual behavior reflecting cortical and  
896 striatal dynamics. *Neuron* *79*, 361–374.

- 897 Spear, L.P. (2000). The adolescent brain and age-related behavioral manifestations. *Neurosci Biobehav*  
898 *Rev* 24, 417–463.
- 899 Steinberg, L., Graham, S., O'Brien, L., Woolard, J., Cauffman, E., and Banich, M. (2009). Age  
900 Differences in Future Orientation and Delay Discounting. *Child Dev.* 80, 28–44.
- 901 Thorn, C.A., Atallah, H., Howe, M., and Graybiel, A.M. (2010). Differential dynamics of activity changes  
902 in dorsolateral and dorsomedial striatal loops during learning. *Neuron* 66, 781–795.
- 903 Thura, D., and Cisek, P. (2017). The Basal Ganglia Do Not Select Reach Targets but Control the Urgency  
904 of Commitment. *Neuron* 95, 1160-1170.e5.
- 905 Vandaele, Y., Mahajan, N.R., Ottenheimer, D.J., Richard, J.M., Mysore, S.P., and Janak, P.H. (2019).  
906 Distinct recruitment of dorsomedial and dorsolateral striatum erodes with extended training. *Elife* 8.
- 907 Vandecasteele, M., M, S., Royer, S., Belluscio, M., Berényi, A., Diba, K., Fujisawa, S., Grosmark, A.,  
908 Mao, D., Mizuseki, K., et al. (2012). Large-scale recording of neurons by movable silicon probes in  
909 behaving rodents. *J. Vis. Exp.* e3568.
- 910 Voon, V., Derbyshire, K., Rück, C., Irvine, M.A., Worbe, Y., Enander, J., Schreiber, L.R.N., Gillan, C.,  
911 Fineberg, N.A., Sahakian, B.J., et al. (2015). Disorders of compulsivity: a common bias towards learning  
912 habits. *Mol. Psychiatry* 20, 345–352.
- 913 Wang, A.Y., Miura, K., and Uchida, N. (2013). The dorsomedial striatum encodes net expected return,  
914 critical for energizing performance vigor. *Nat. Neurosci.* 16, 639–647.
- 915 Wassum, K.M., Cely, I.C., Balleine, B.W., and Maidment, N.T. (2011). Micro-opioid receptor activation in  
916 the basolateral amygdala mediates the learning of increases but not decreases in the incentive value of a  
917 food reward. *J. Neurosci.* 31, 1591–1599.
- 918 Wittmann, M., and Paulus, M.P. (2008). Decision making, impulsivity and time perception. *Trends Cogn.*  
919 *Sci.* 12, 7–12.
- 920 Wu, H., Miller, K.J., Blumenfeld, Z., Williams, N.R., Ravikumar, V.K., Lee, K.E., Kakusa, B., Sacchet,  
921 M.D., Wintermark, M., Christoffel, D.J., et al. (2018). Closing the loop on impulsivity via nucleus  
922 accumbens delta-band activity in mice and man. *Proc. Natl. Acad. Sci. U. S. A.* 115, 192–197.
- 923 Yamada, H., Inokawa, H., Matsumoto, N., Ueda, Y., and Kimura, M. (2011). Neuronal basis for evaluating  
924 selected action in the primate striatum. *Eur. J. Neurosci.* 34, 489–506.
- 925 Yau, Y., Dadar, M., Taylor, M., Zeighami, Y., Fellows, L.K., Cisek, P., and Dagher, A. (2020). Neural  
926 Correlates of Evidence and Urgency During Human Perceptual Decision-Making in Dynamically  
927 Changing Conditions. *Cereb. Cortex* 30, 5471–5483.
- 928 Yin, H.H., and Knowlton, B.J. (2006). The role of the basal ganglia in habit formation. *Nat Rev Neurosci*  
929 7, 464–476.
- 930 Yin, H.H., Knowlton, B.J., and Balleine, B.W. (2004). Lesions of dorsolateral striatum preserve outcome  
931 expectancy but disrupt habit formation in instrumental learning. *Eur. J. Neurosci.* 19, 181–189.

- 932 Zhou, S., Masmanidis, S.C., and Buonomano, D. V. (2020). Neural Sequences as an Optimal Dynamical  
933 Regime for the Readout of Time. *Neuron* 108, 651-658.e5.
- 934 Zold, C.L., and Hussain Shuler, M.G. (2015). Theta Oscillations in Visual Cortex Emerge with Experience  
935 to Convey Expected Reward Time and Experienced Reward Rate. *J. Neurosci.* 35, 9603–9614.  
936



## Figure 1

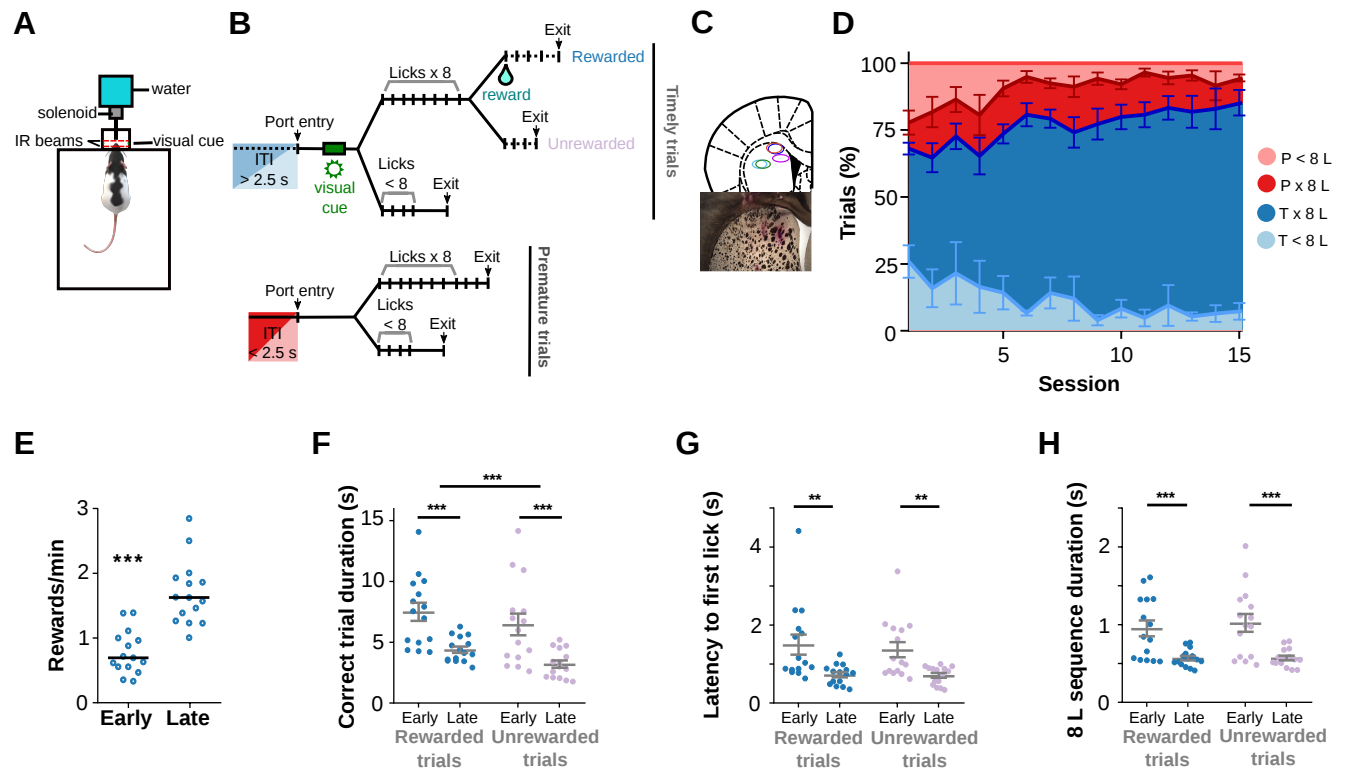

**Figure 2**

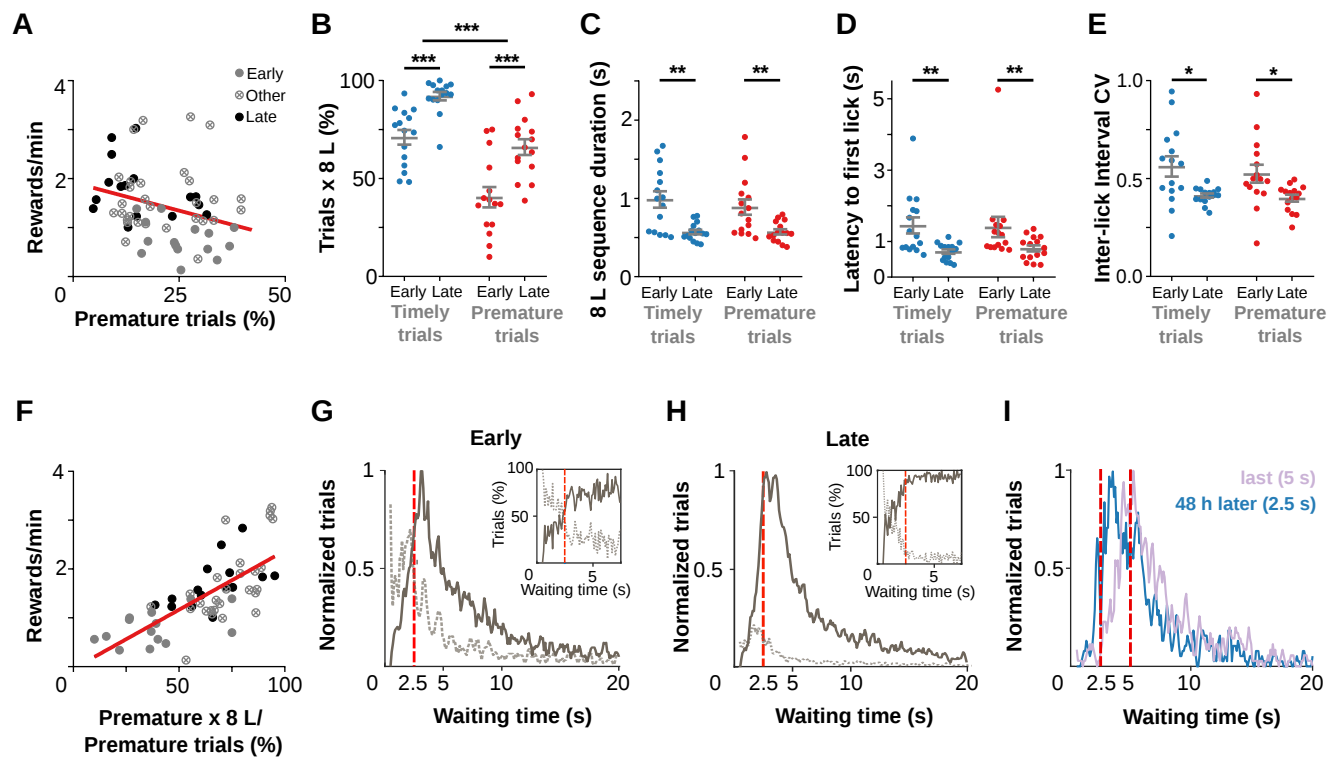

**Figure 3**

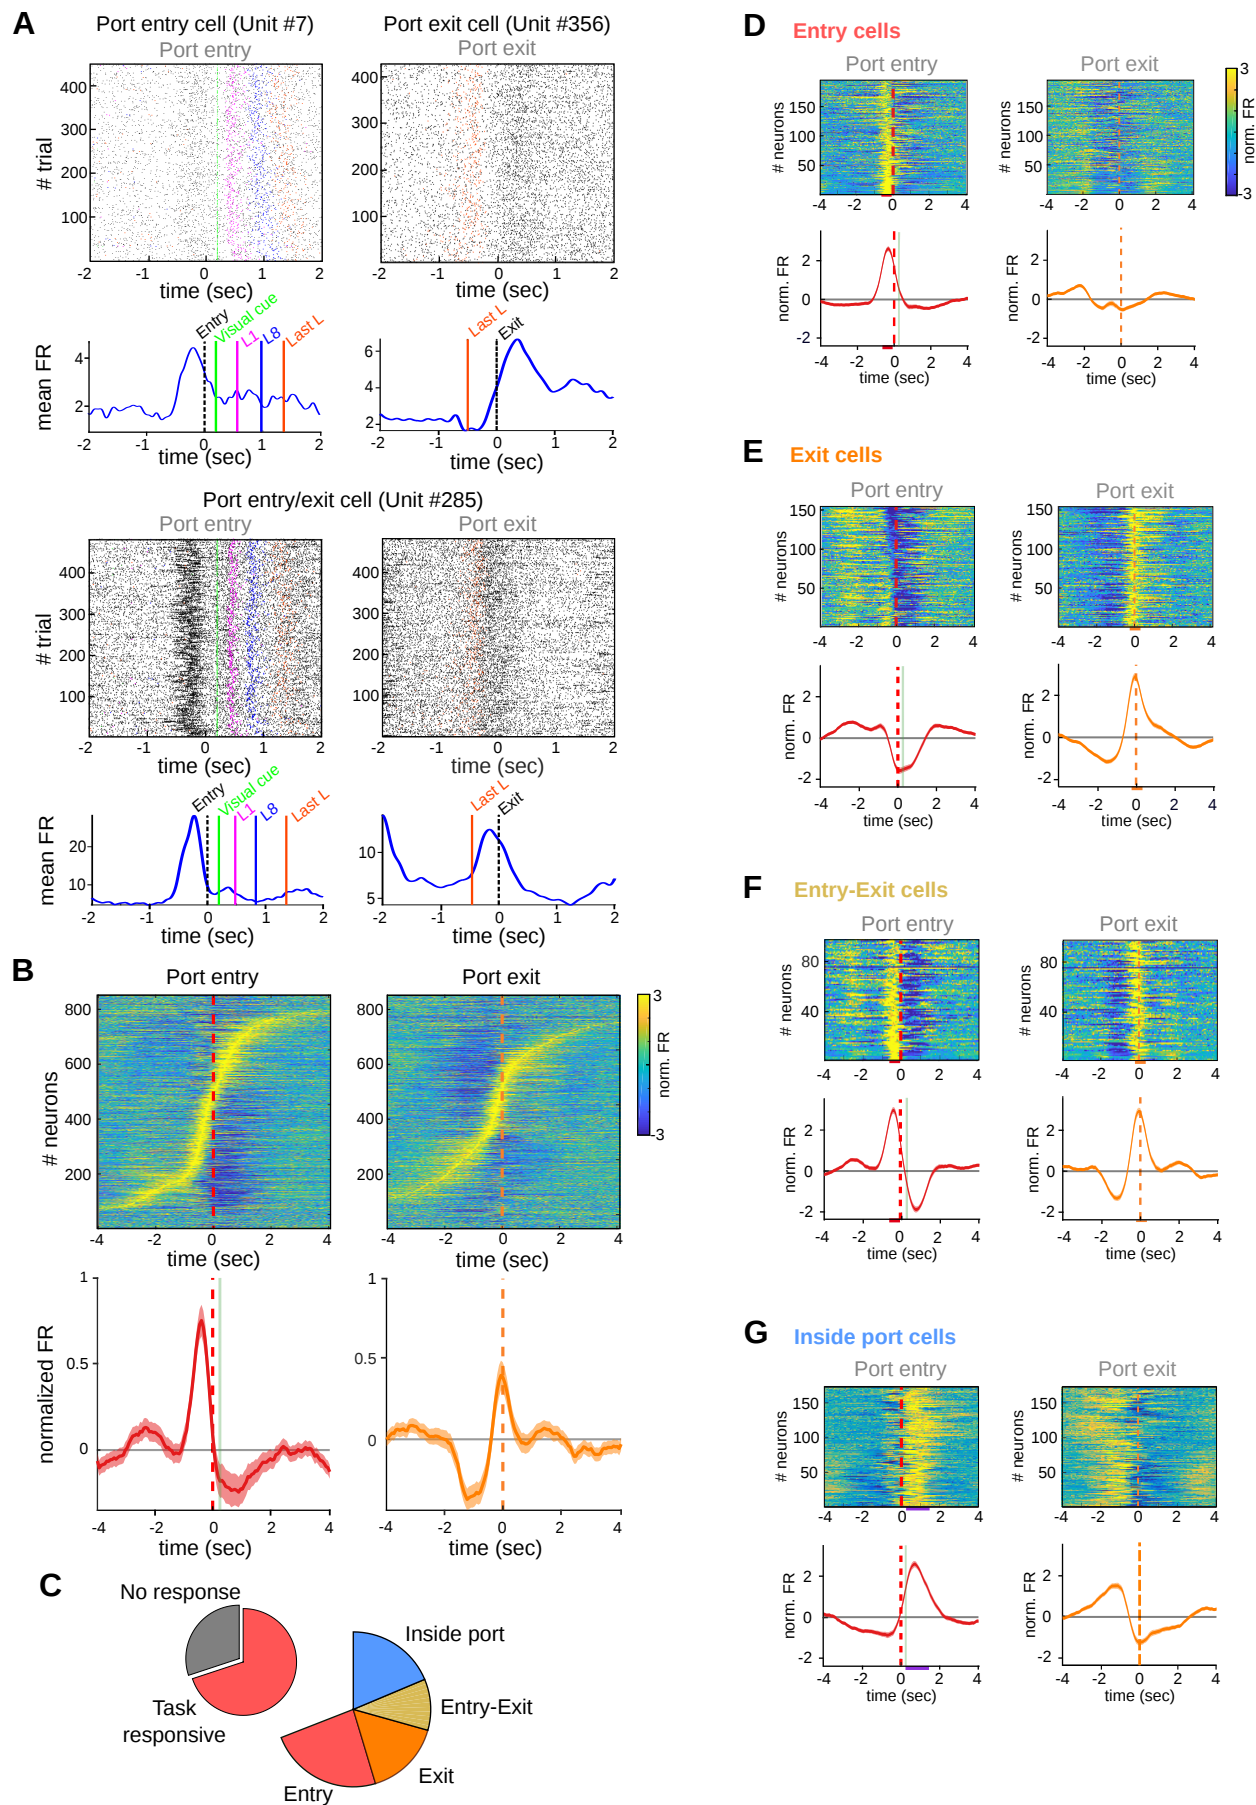

**Figure 4**

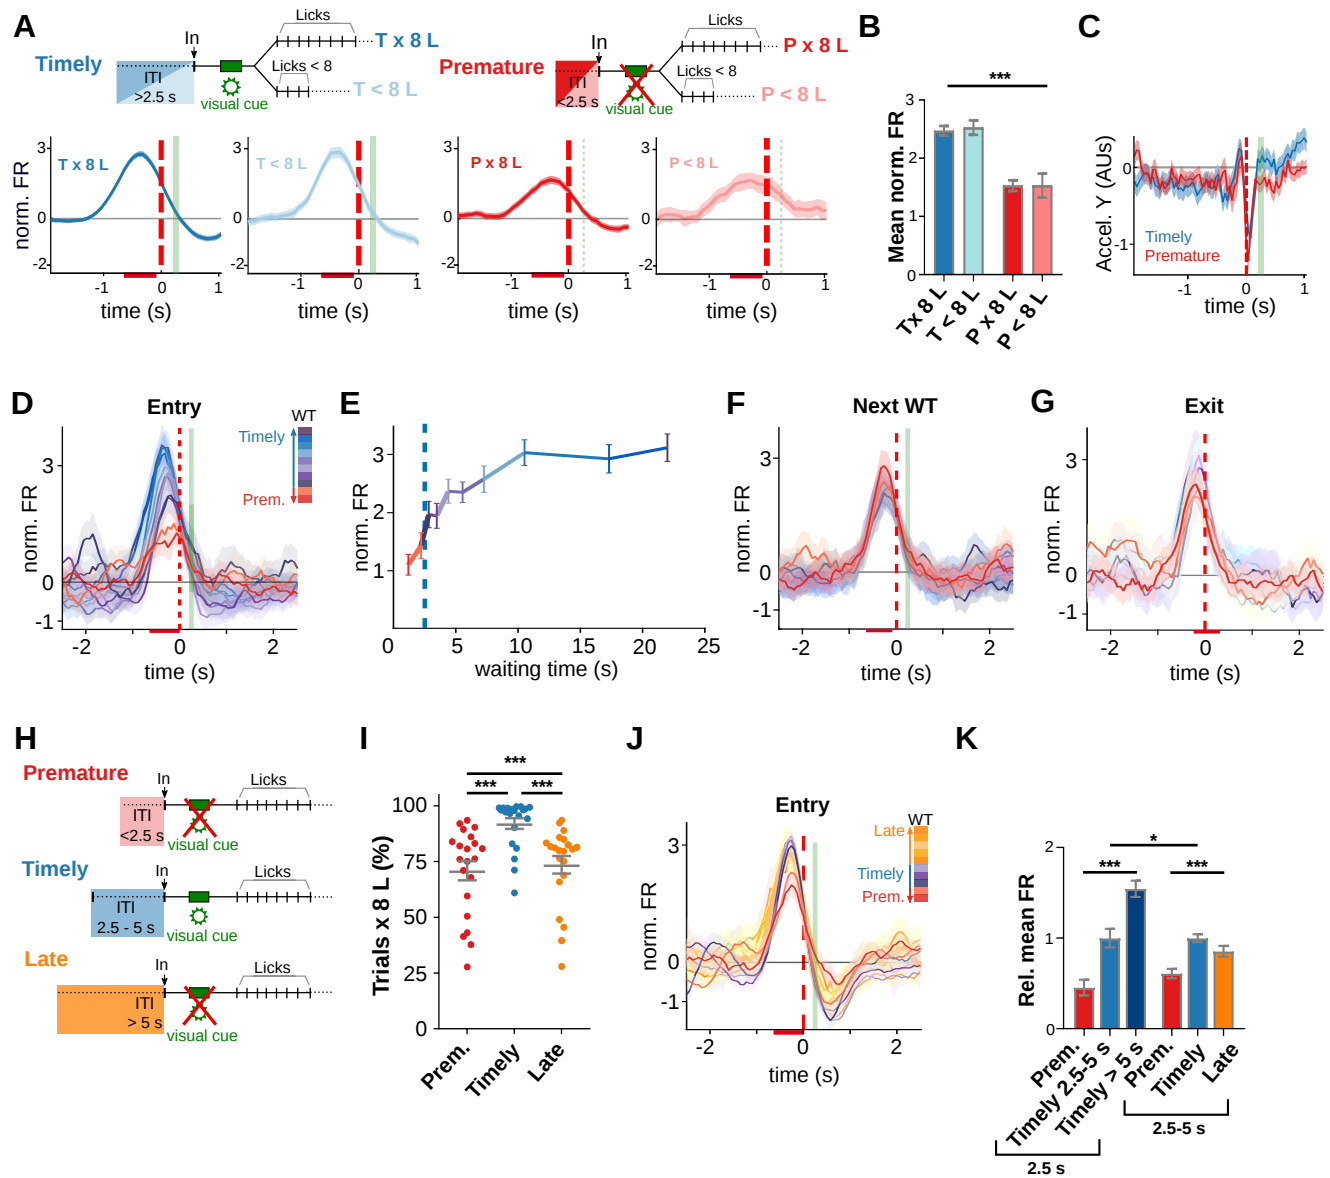

## Figure 5

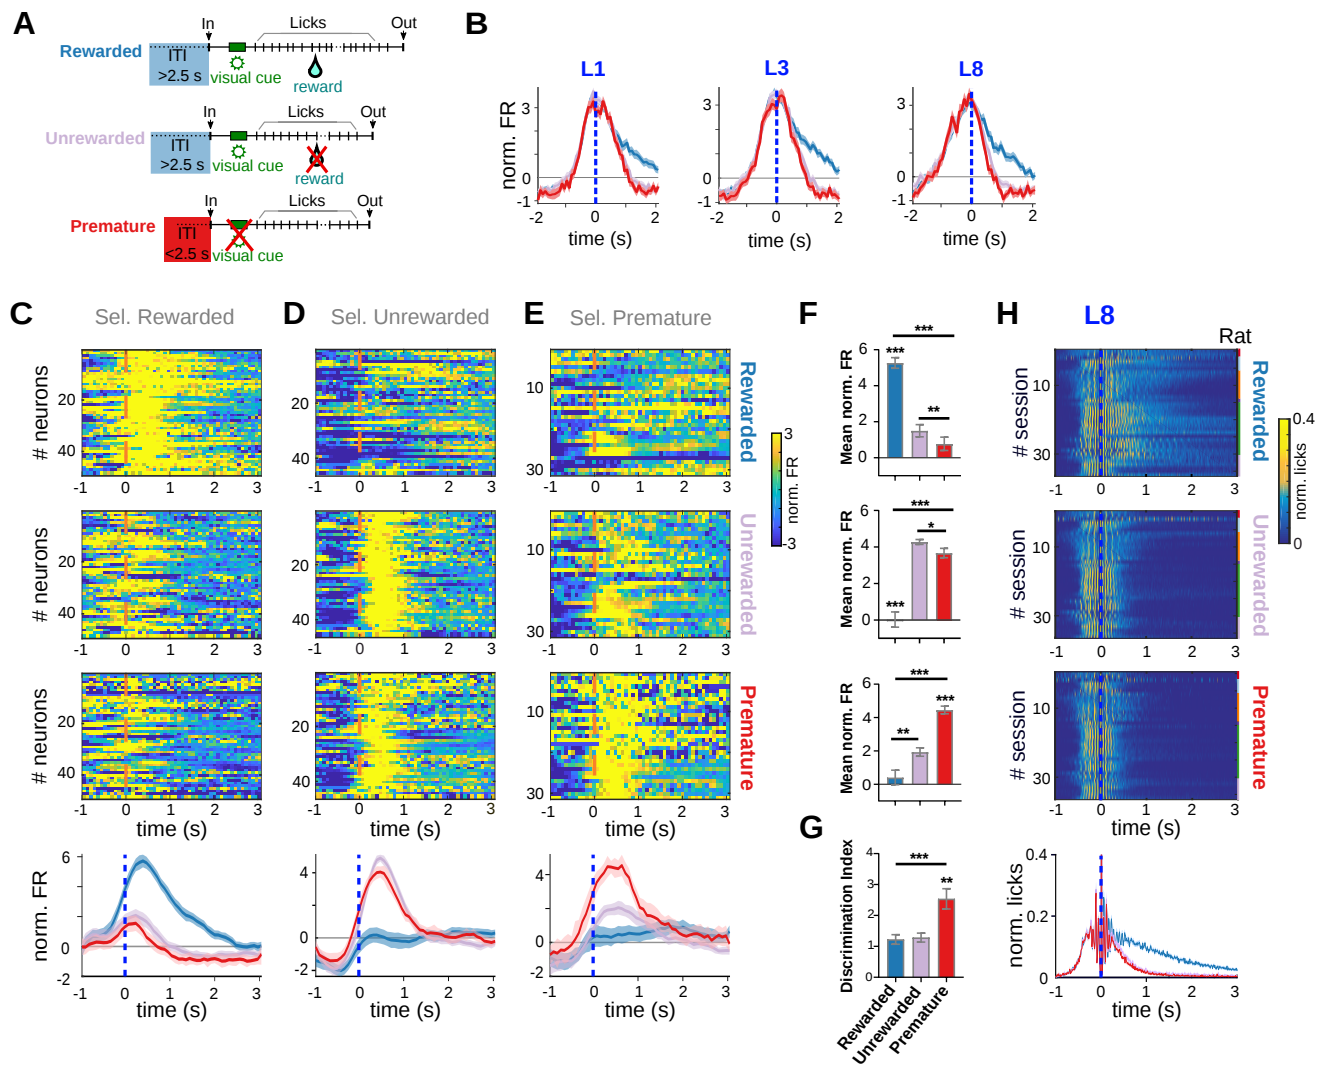

## Figure 6

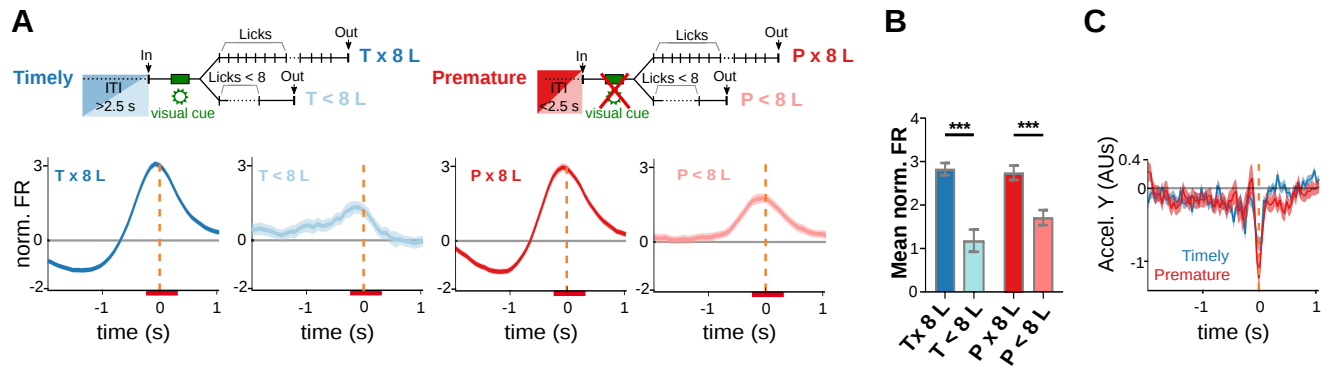

**Figure 7**

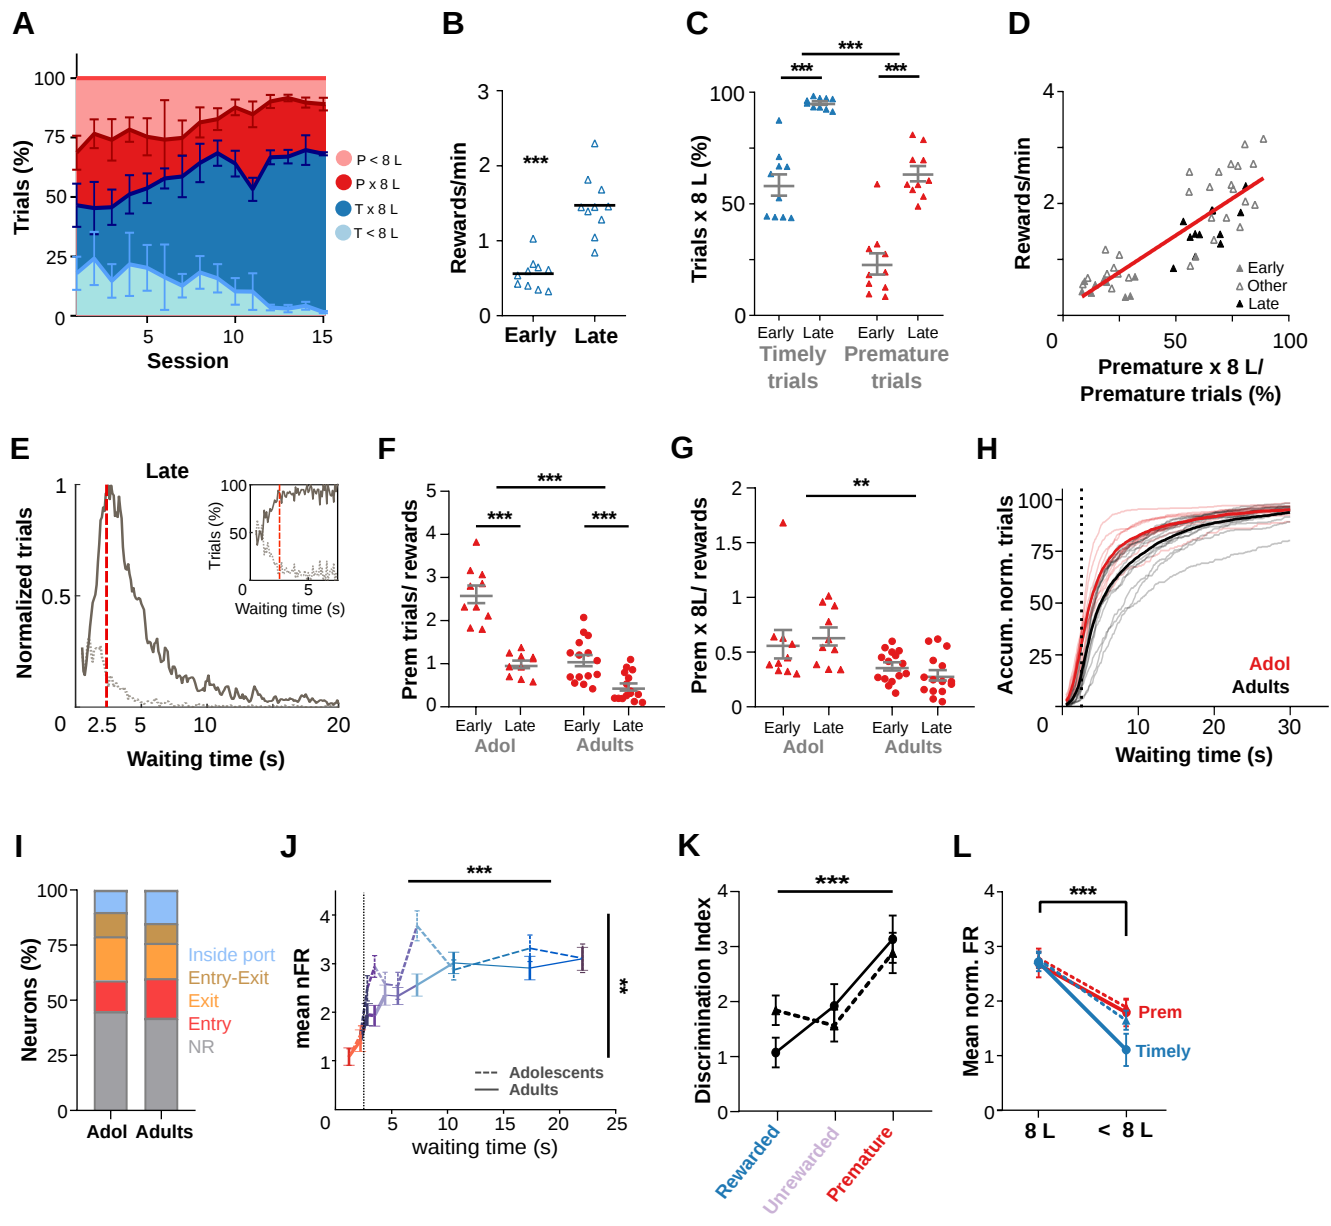

## Figure S1

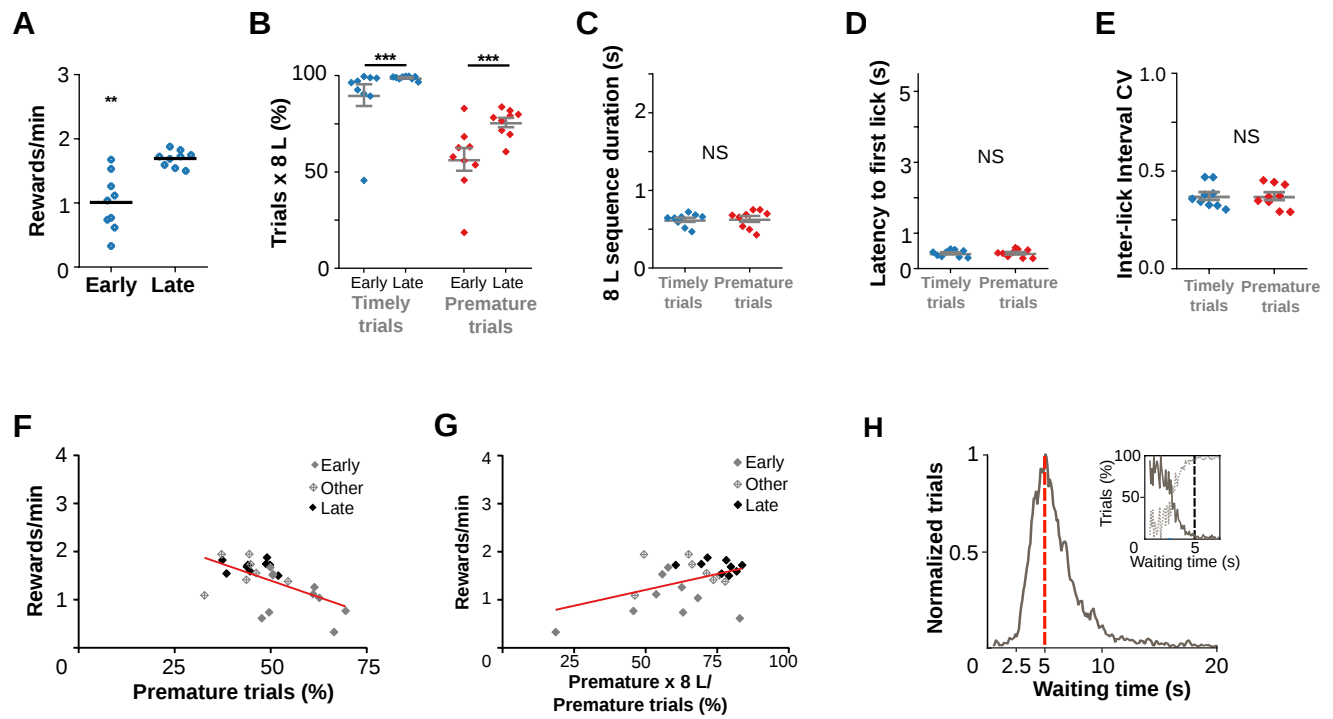



## Figure S2

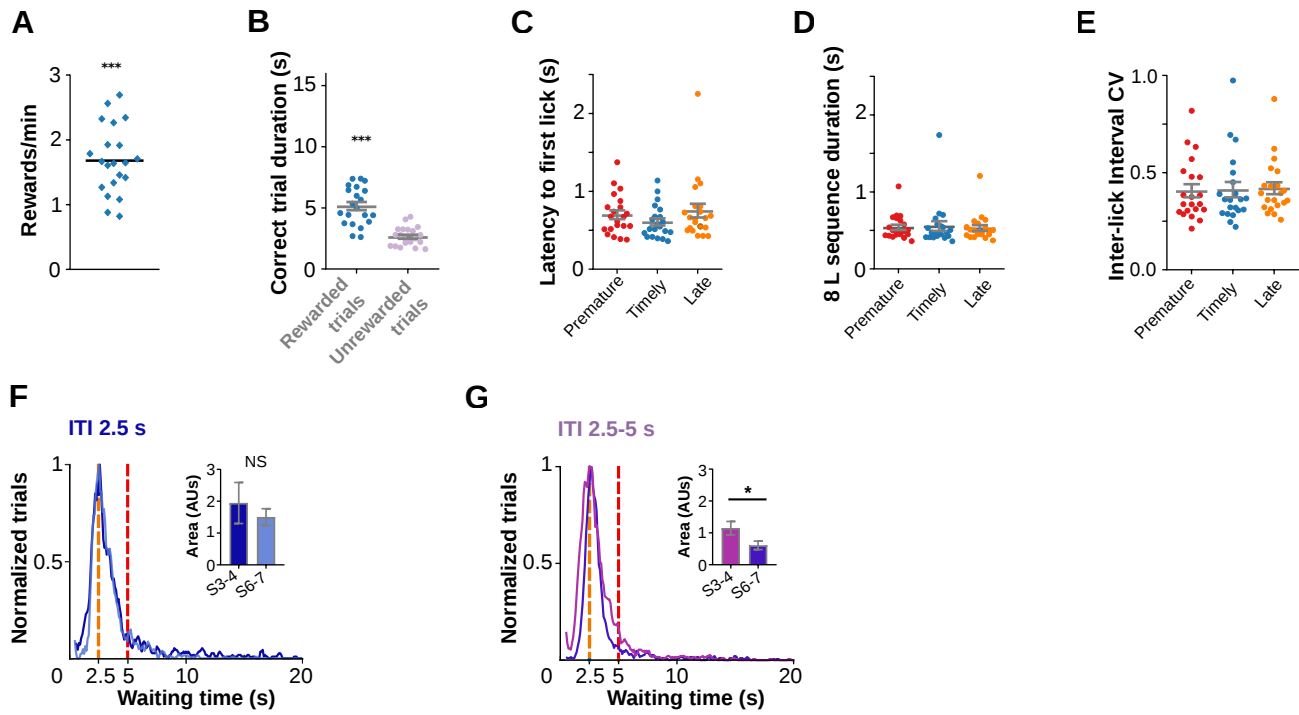

## Figure S3

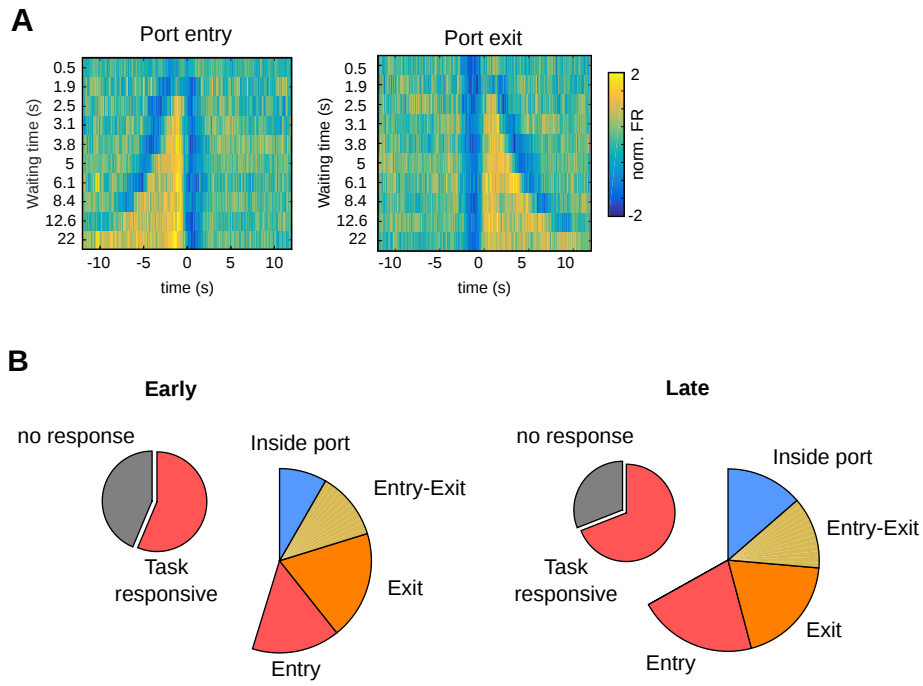

## Figure S4

### A Entry cells, Port entry

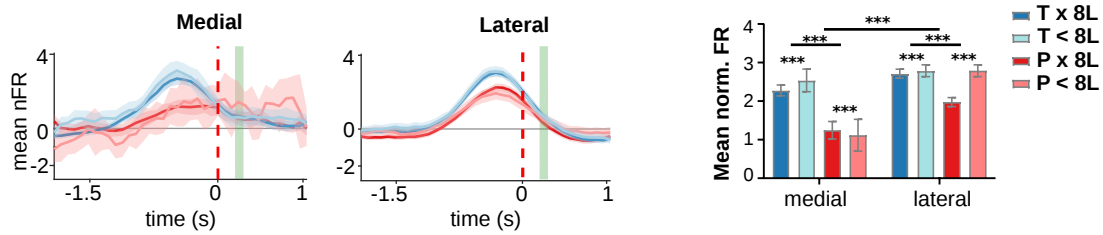

### B Entry-Exit cells, Port entry

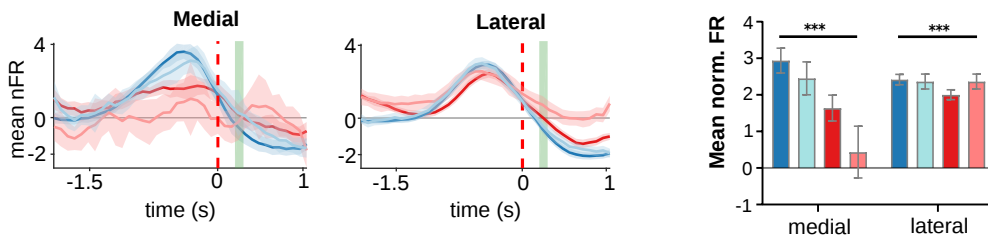

### C Exit cells, Port exit

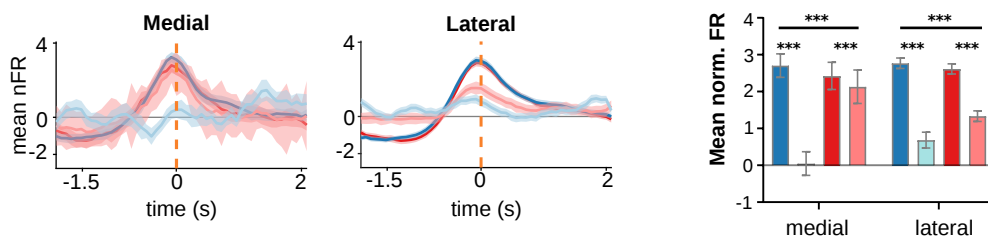

### D Entry-Exit cells, Port exit

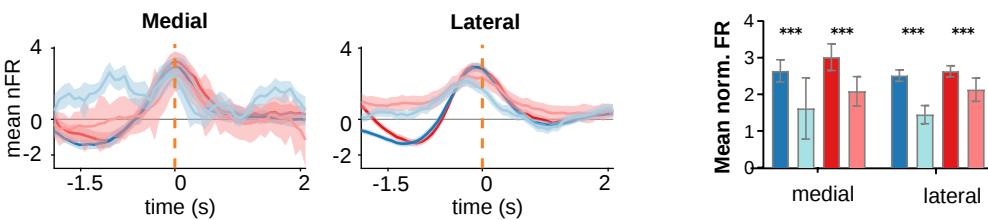

## Figure S5

**A**

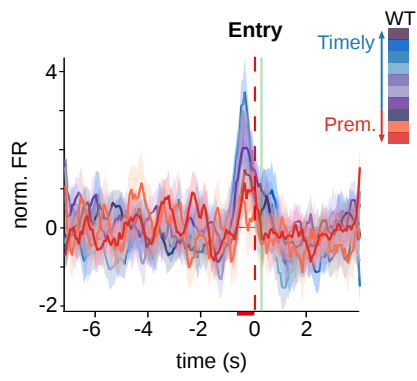

**B**

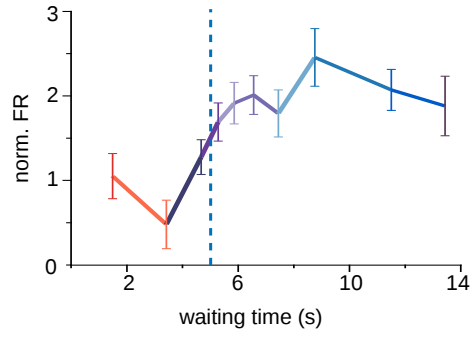

## Figure S6

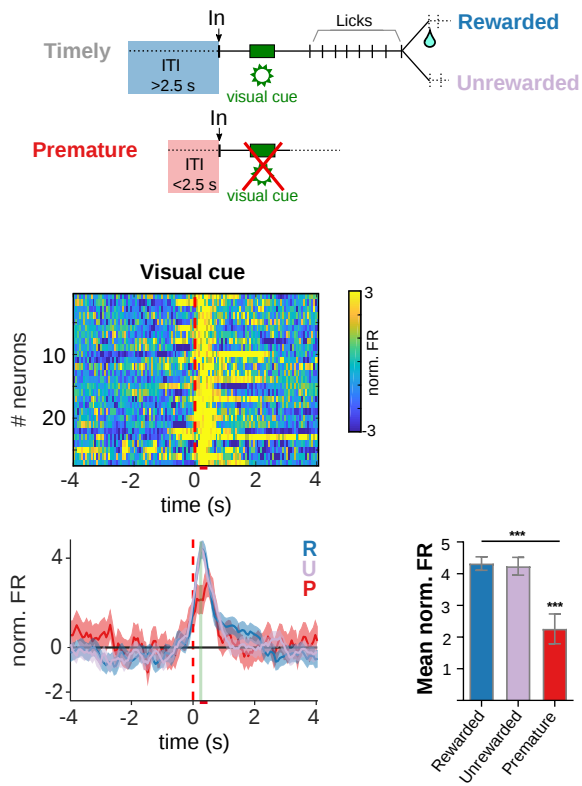

Figure S7

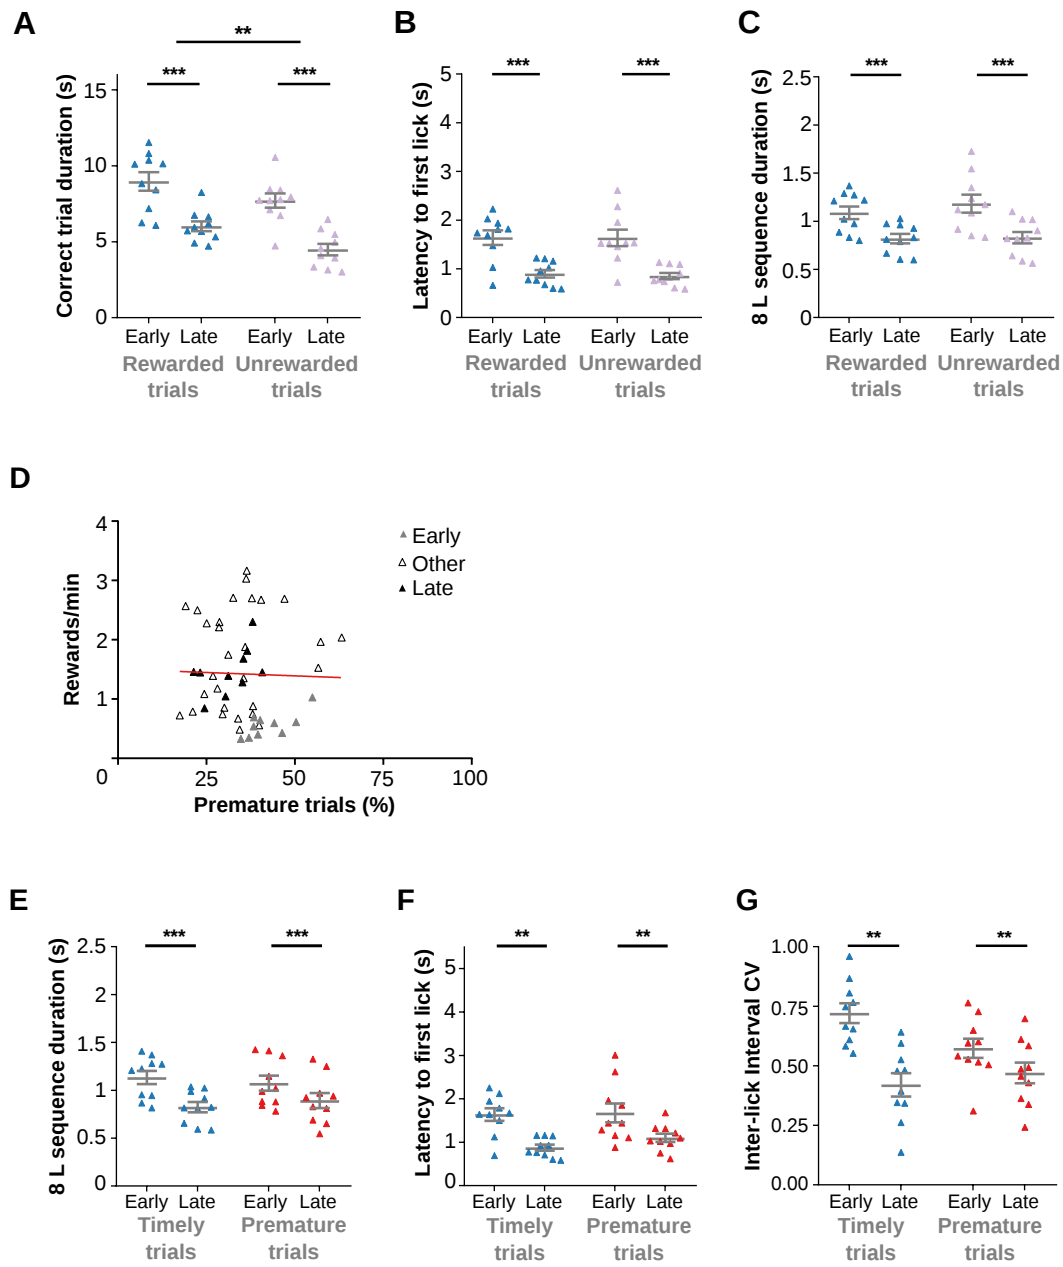

## Figure S8

**A**

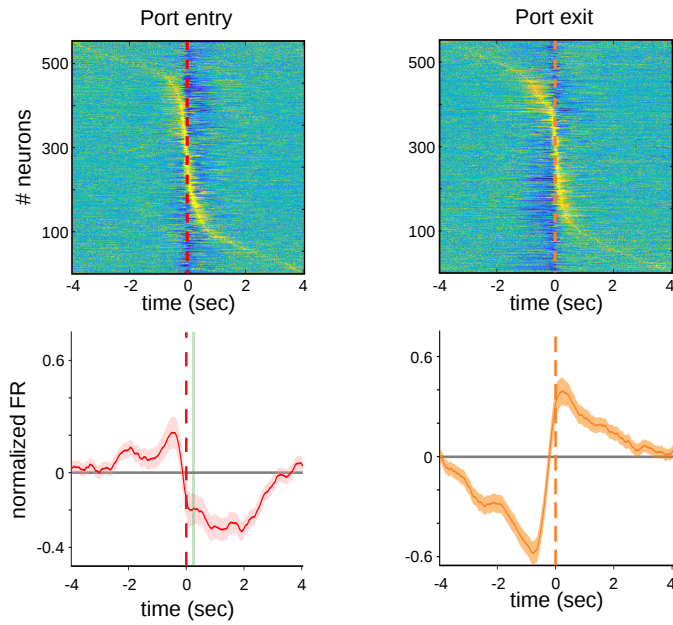

**B**

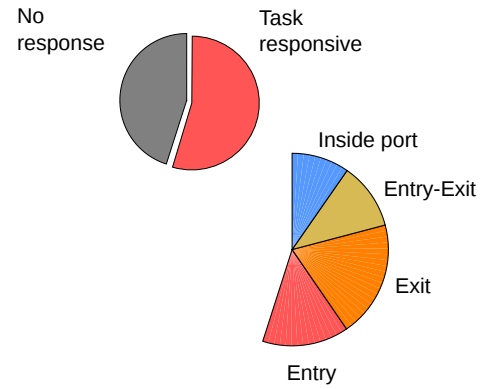

**C Entry cells**

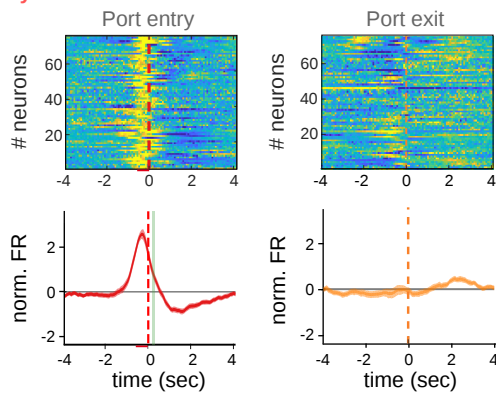

**D Exit cells**

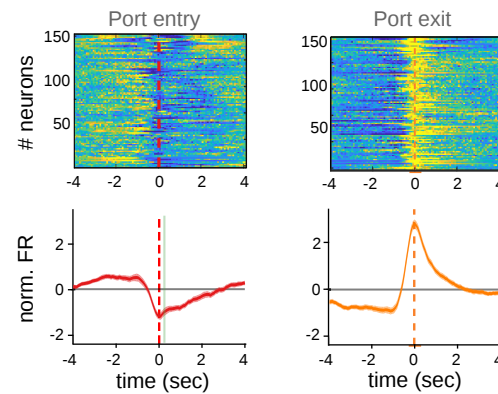

**E Entry-Exit cells**

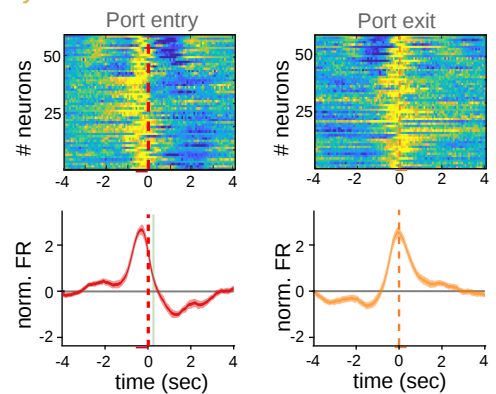

**F Inside port cells**

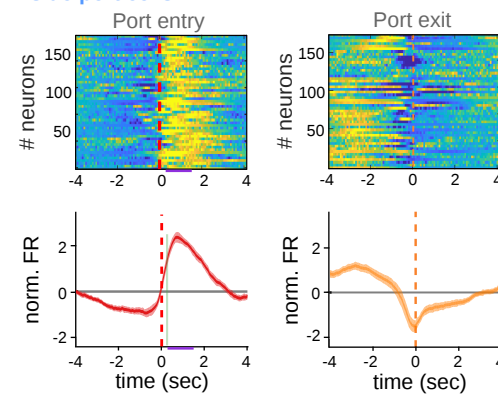

## Figure S9

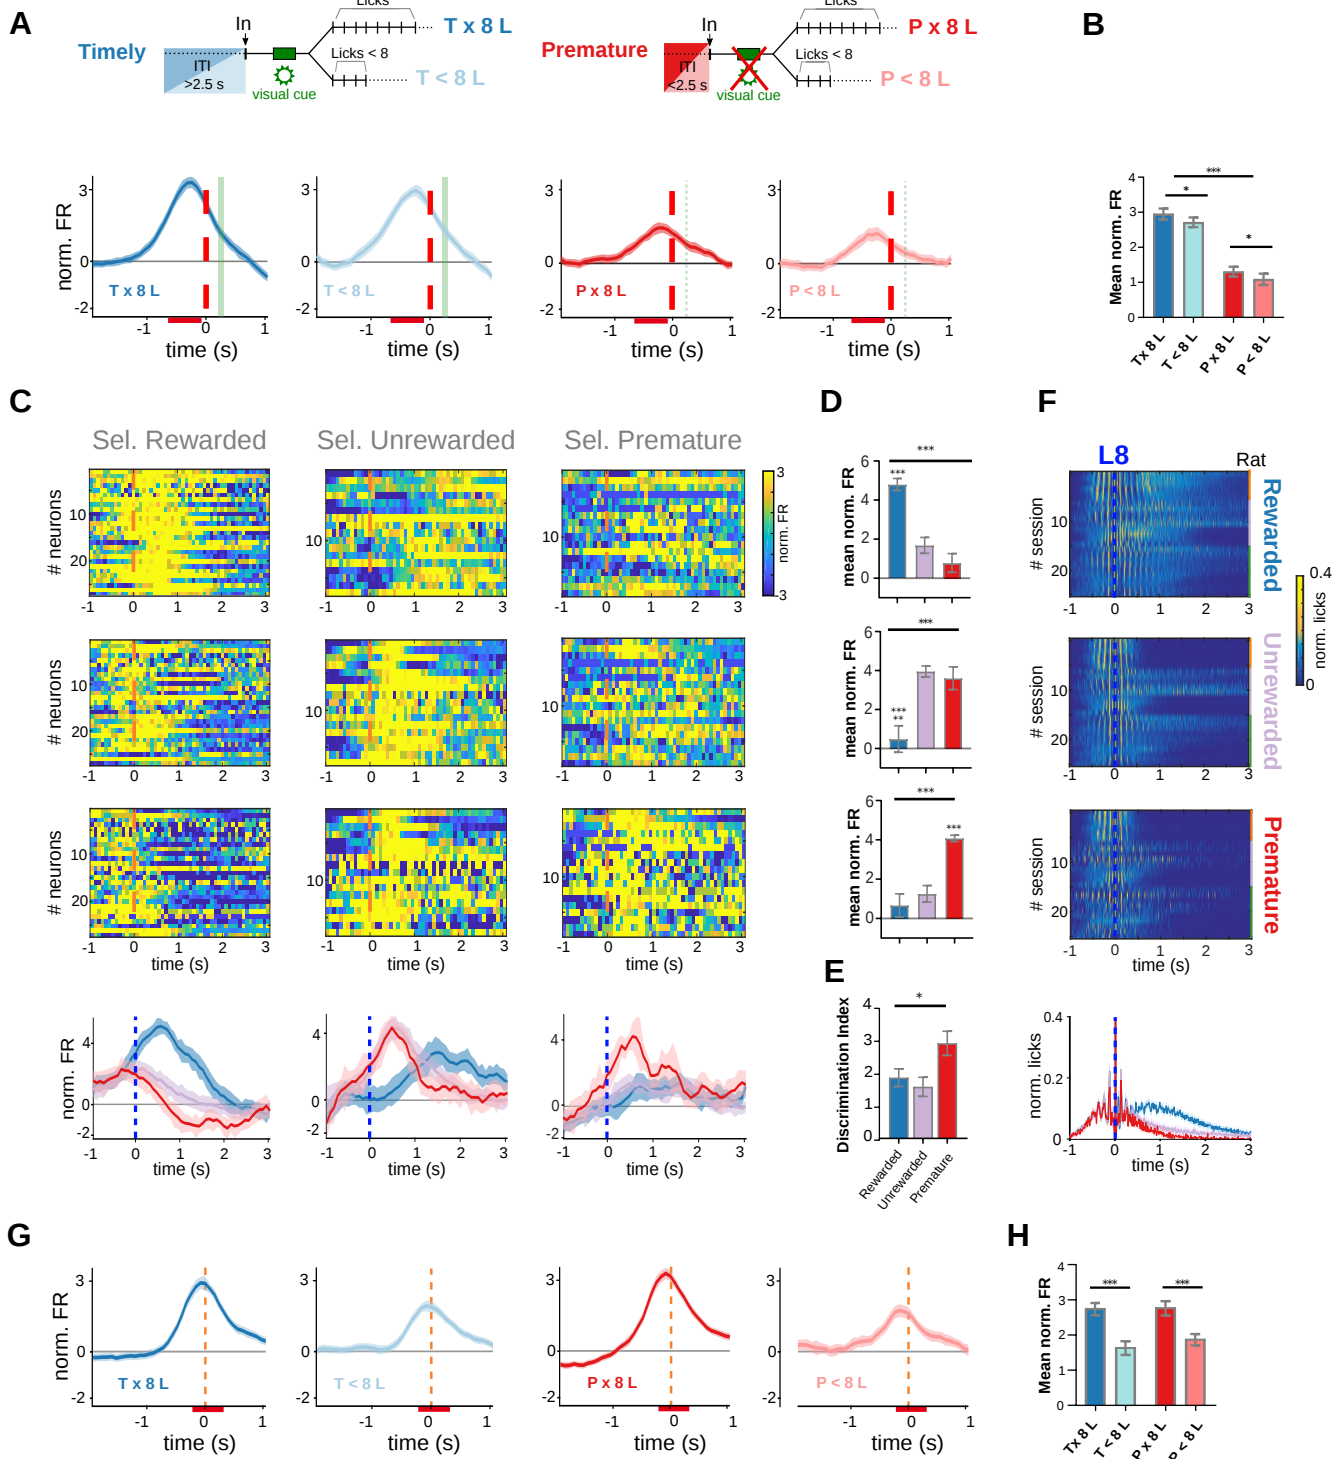



## Figure S10

### Adults 2.5s WT

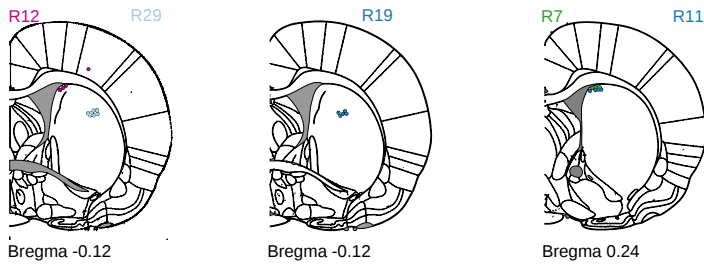

### Adults 5s WT

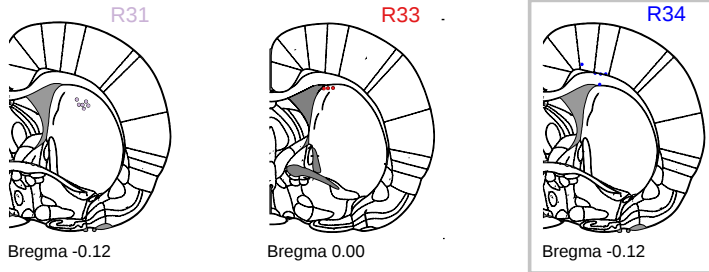

### Adults 2.5- 5s WT

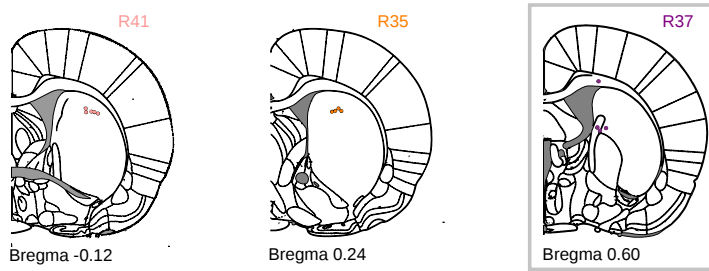

### Adolescents 2.5s WT

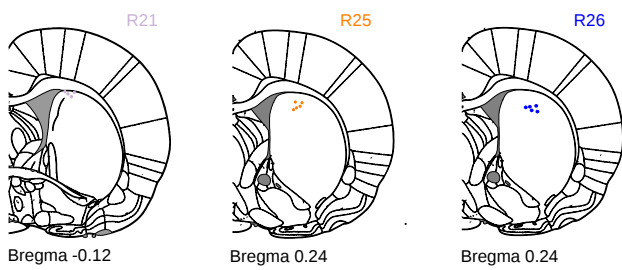

Source: https://www.biorxiv.org/content/10.1101/2021.11.01.466347v1.full.pdf
